# Supplementary material
Source: publisher figshare collection journal article supplement (https://acs.figshare.com/ndownloader/files/5827317)
Supplement: Supplementary file 1 [file 5827317]

 
# ol005503o.cif

data_1 
 
_audit_creation_method            SHELXL-97 
_chemical_name_systematic 
; 
 ? 
; 
_chemical_name_common             ? 
_chemical_formula_moiety          ? 
_chemical_formula_sum 
 'C16 H16 N2 O6' 
_chemical_formula_weight          332.31 
 
loop_ 
 _atom_type_symbol 
 _atom_type_description 
 _atom_type_scat_dispersion_real 
 _atom_type_scat_dispersion_imag 
 _atom_type_scat_source 
 'C'  'C'   0.0033   0.0016 
 'International Tables Vol C Tables 4.2.6.8 and 6.1.1.4' 
 'H'  'H'   0.0000   0.0000 
 'International Tables Vol C Tables 4.2.6.8 and 6.1.1.4' 
 'N'  'N'   0.0061   0.0033 
 'International Tables Vol C Tables 4.2.6.8 and 6.1.1.4' 
 'O'  'O'   0.0106   0.0060 
 'International Tables Vol C Tables 4.2.6.8 and 6.1.1.4' 
 
_symmetry_cell_setting            ? 
_symmetry_space_group_name_H-M    ? 
 
loop_ 
 _symmetry_equiv_pos_as_xyz 
 'x, y, z' 
 '-x, y+1/2, -z+1/2' 
 '-x, -y, -z' 
 'x, -y-1/2, z-1/2' 
 
_cell_length_a                    8.7139(4) 
_cell_length_b                    16.7814(8) 
_cell_length_c                    10.7419(7) 
_cell_angle_alpha                 90.00 
_cell_angle_beta                  90.406(5) 
_cell_angle_gamma                 90.00 
_cell_volume                      1570.76(15) 
_cell_formula_units_Z             4 
_cell_measurement_temperature     293(2) 
_cell_measurement_reflns_used     ? 
_cell_measurement_theta_min       ? 
_cell_measurement_theta_max       ? 
 
_exptl_crystal_description        ? 
_exptl_crystal_colour             ? 
_exptl_crystal_size_max           ? 
_exptl_crystal_size_mid           ? 
_exptl_crystal_size_min           ? 
_exptl_crystal_density_meas       ? 
_exptl_crystal_density_diffrn     1.405 
_exptl_crystal_density_method     'not measured' 
_exptl_crystal_F_000              696 
_exptl_absorpt_coefficient_mu     0.109 
_exptl_absorpt_correction_type    ? 
_exptl_absorpt_correction_T_min   ? 
_exptl_absorpt_correction_T_max   ? 
 
_exptl_special_details 
; 
 ? 
; 
 
_diffrn_ambient_temperature       293(2) 
_diffrn_radiation_wavelength      0.71073 
_diffrn_radiation_type            MoK\a 
_diffrn_radiation_source          'fine-focus sealed tube' 
_diffrn_radiation_monochromator   graphite 
_diffrn_measurement_device_type   ? 
_diffrn_measurement_method        ? 
_diffrn_detector_area_resol_mean  ? 
_diffrn_standards_number          ? 
_diffrn_standards_interval_count  ? 
_diffrn_standards_interval_time   ? 
_diffrn_standards_decay_%         ? 
_diffrn_reflns_number             4220 
_diffrn_reflns_av_R_equivalents   0.0225 
_diffrn_reflns_av_sigmaI/netI     0.0231 
_diffrn_reflns_limit_h_min        -11 
_diffrn_reflns_limit_h_max        11 
_diffrn_reflns_limit_k_min        0 
_diffrn_reflns_limit_k_max        21 
_diffrn_reflns_limit_l_min        -13 
_diffrn_reflns_limit_l_max        13 
_diffrn_reflns_theta_min          2.25 
_diffrn_reflns_theta_max          26.97 
_reflns_number_total              3420 
_reflns_number_gt                 2614 
_reflns_threshold_expression      >2sigma(I) 
 
_computing_data_collection        ? 
_computing_cell_refinement        ? 
_computing_data_reduction         ? 
_computing_structure_solution     'SHELXS-97 (Sheldrick, 1990)' 
_computing_structure_refinement   'SHELXL-97 (Sheldrick, 1997)' 
_computing_molecular_graphics     ? 
_computing_publication_material   ? 
 
_refine_special_details 
; 
 Refinement of F^2^ against ALL reflections.  The weighted R-factor wR and 
 goodness of fit S are based on F^2^, conventional R-factors R are based 
 on F, with F set to zero for negative F^2^. The threshold expression of 
 F^2^ > 2sigma(F^2^) is used only for calculating R-factors(gt) etc. and is 
 not relevant to the choice of reflections for refinement.  R-factors based 
 on F^2^ are statistically about twice as large as those based on F, and R- 
 factors based on ALL data will be even larger. 
; 
 
_refine_ls_structure_factor_coef  Fsqd  
_refine_ls_matrix_type            full 
_refine_ls_weighting_scheme 
 'calc w=1/[\s^2^(Fo^2^)+(0.0318P)^2^+0.6774P] where P=(Fo^2^+2Fc^2^)/3' 
_atom_sites_solution_primary      direct 
_atom_sites_solution_secondary    difmap 
_atom_sites_solution_hydrogens    geom 
_refine_ls_hydrogen_treatment     mixed 
_refine_ls_extinction_method      SHELXL 
_refine_ls_extinction_coef        0.0029(6) 
_refine_ls_extinction_expression 
 'Fc^*^=kFc[1+0.001xFc^2^\l^3^/sin(2\q)]^-1/4^' 
_refine_ls_number_reflns          3420 
_refine_ls_number_parameters      282 
_refine_ls_number_restraints      0 
_refine_ls_R_factor_all           0.0746 
_refine_ls_R_factor_gt            0.0525 
_refine_ls_wR_factor_ref          0.1210 
_refine_ls_wR_factor_gt           0.1134 
_refine_ls_goodness_of_fit_ref    1.192 
_refine_ls_restrained_S_all       1.192 
_refine_ls_shift/su_max           0.015 
_refine_ls_shift/su_mean          0.002 
 
loop_ 
 _atom_site_label 
 _atom_site_type_symbol 
 _atom_site_fract_x 
 _atom_site_fract_y 
 _atom_site_fract_z 
 _atom_site_U_iso_or_equiv 
 _atom_site_adp_type 
 _atom_site_occupancy 
 _atom_site_calc_flag 
 _atom_site_refinement_flags 
 _atom_site_disorder_assembly 
 _atom_site_disorder_group 
O1 O 0.51866(19) 0.22270(9) 0.23347(16) 0.0555(4) Uani 1 d . . . 
O2 O 0.50127(18) 0.49008(9) 0.17414(15) 0.0519(4) Uani 1 d . . . 
O3 O 0.8756(2) 0.21364(11) 0.25799(15) 0.0643(5) Uani 1 d . . . 
O4 O 0.8584(2) 0.50072(11) 0.21540(17) 0.0683(5) Uani 1 d . . . 
O5 O 0.79634(17) 0.14094(8) 0.09457(13) 0.0450(4) Uani 1 d . . . 
O6 O 0.7932(2) 0.55355(9) 0.03076(15) 0.0569(4) Uani 1 d . . . 
N1 N 0.47988(18) 0.35740(9) 0.22098(15) 0.0368(4) Uani 1 d . . . 
N2 N 0.8743(2) 0.35042(11) 0.1095(2) 0.0462(4) Uani 1 d . . . 
C1 C 0.2323(3) 0.34498(16) 0.3206(2) 0.0555(6) Uani 1 d . . . 
C2 C 0.1415(3) 0.35239(19) 0.4241(3) 0.0686(8) Uani 1 d . . . 
C3 C 0.2022(3) 0.37997(17) 0.5343(2) 0.0612(7) Uani 1 d . . . 
C4 C 0.3545(3) 0.40021(16) 0.5420(2) 0.0557(6) Uani 1 d . . . 
C5 C 0.4470(3) 0.39269(14) 0.4389(2) 0.0470(5) Uani 1 d . . . 
C6 C 0.3851(2) 0.36536(11) 0.32922(18) 0.0366(4) Uani 1 d . . . 
C7 C 0.5361(2) 0.28490(11) 0.17950(18) 0.0367(4) Uani 1 d . . . 
C8 C 0.5285(2) 0.42156(12) 0.14965(18) 0.0368(4) Uani 1 d . . . 
C9 C 0.6224(2) 0.29925(12) 0.05960(18) 0.0366(4) Uani 1 d . . . 
C10 C 0.6200(2) 0.38959(12) 0.04213(18) 0.0375(4) Uani 1 d . . . 
C11 C 0.7962(2) 0.27832(13) 0.06964(19) 0.0398(5) Uani 1 d . . . 
C12 C 0.7930(2) 0.41436(13) 0.0467(2) 0.0424(5) Uani 1 d . . . 
C13 C 0.8284(2) 0.20840(13) 0.15283(19) 0.0420(5) Uani 1 d . . . 
C14 C 0.8201(2) 0.49340(14) 0.1087(2) 0.0467(5) Uani 1 d . . . 
C15 C 0.7991(4) 0.06877(17) 0.1682(3) 0.0637(7) Uani 1 d . . . 
C16 C 0.7975(4) 0.63277(16) 0.0832(3) 0.0630(7) Uani 1 d . . . 
H1 H 0.192(3) 0.3268(17) 0.242(3) 0.075(8) Uiso 1 d . . . 
H2 H 0.033(4) 0.3385(17) 0.418(3) 0.088(9) Uiso 1 d . . . 
H3 H 0.137(3) 0.3846(16) 0.606(3) 0.076(8) Uiso 1 d . . . 
H4 H 0.399(3) 0.4207(16) 0.618(3) 0.071(8) Uiso 1 d . . . 
H5 H 0.550(3) 0.4068(15) 0.441(2) 0.064(7) Uiso 1 d . . . 
H6 H 0.571(3) 0.2694(14) -0.002(2) 0.052(6) Uiso 1 d . . . 
H7 H 0.571(3) 0.4081(13) -0.032(2) 0.052(6) Uiso 1 d . . . 
H8 H 0.829(2) 0.2650(12) -0.0089(19) 0.034(5) Uiso 1 d . . . 
H9 H 0.826(2) 0.4184(12) -0.032(2) 0.042(6) Uiso 1 d . . . 
H10 H 0.865(3) 0.3565(15) 0.187(2) 0.060(8) Uiso 1 d . . . 
H11 H 0.894(4) 0.0650(18) 0.218(3) 0.087(10) Uiso 1 d . . . 
H12 H 0.794(4) 0.024(2) 0.112(3) 0.119(13) Uiso 1 d . . . 
H13 H 0.718(4) 0.072(2) 0.224(3) 0.113(13) Uiso 1 d . . . 
H14 H 0.892(4) 0.6440(17) 0.127(3) 0.084(10) Uiso 1 d . . . 
H15 H 0.781(3) 0.6713(19) 0.017(3) 0.085(10) Uiso 1 d . . . 
H16 H 0.714(4) 0.6383(17) 0.146(3) 0.090(10) Uiso 1 d . . . 
 
loop_ 
 _atom_site_aniso_label 
 _atom_site_aniso_U_11 
 _atom_site_aniso_U_22 
 _atom_site_aniso_U_33 
 _atom_site_aniso_U_23 
 _atom_site_aniso_U_13 
 _atom_site_aniso_U_12 
O1 0.0672(11) 0.0342(8) 0.0653(10) 0.0062(7) 0.0226(8) 0.0014(7) 
O2 0.0603(10) 0.0365(8) 0.0592(10) 0.0064(7) 0.0144(8) 0.0087(7) 
O3 0.0815(12) 0.0673(11) 0.0440(9) -0.0015(8) -0.0163(8) 0.0051(10) 
O4 0.0829(13) 0.0647(12) 0.0571(11) -0.0121(9) -0.0181(9) -0.0032(10) 
O5 0.0489(8) 0.0422(8) 0.0438(8) -0.0012(7) 0.0008(7) 0.0030(7) 
O6 0.0751(11) 0.0446(9) 0.0511(9) -0.0013(7) 0.0080(8) -0.0166(8) 
N1 0.0367(8) 0.0353(9) 0.0386(9) 0.0024(7) 0.0060(7) 0.0009(7) 
N2 0.0383(9) 0.0496(11) 0.0507(12) -0.0032(9) 0.0025(8) -0.0021(8) 
C1 0.0469(13) 0.0719(17) 0.0479(14) -0.0112(12) 0.0088(10) -0.0158(12) 
C2 0.0507(15) 0.090(2) 0.0651(17) -0.0112(15) 0.0194(13) -0.0191(14) 
C3 0.0668(16) 0.0693(17) 0.0479(14) -0.0020(12) 0.0238(12) -0.0015(13) 
C4 0.0684(16) 0.0610(15) 0.0377(12) -0.0029(11) -0.0006(11) 0.0061(13) 
C5 0.0431(12) 0.0529(13) 0.0451(12) 0.0007(10) -0.0031(9) 0.0027(10) 
C6 0.0374(10) 0.0332(10) 0.0394(10) 0.0024(8) 0.0042(8) 0.0010(8) 
C7 0.0363(10) 0.0333(11) 0.0407(10) -0.0017(8) 0.0018(8) -0.0009(8) 
C8 0.0347(10) 0.0368(11) 0.0388(11) 0.0046(8) -0.0032(8) 0.0027(8) 
C9 0.0405(11) 0.0373(10) 0.0318(10) -0.0047(8) -0.0035(8) -0.0008(9) 
C10 0.0432(11) 0.0395(11) 0.0297(10) 0.0039(8) -0.0013(8) -0.0025(9) 
C11 0.0401(11) 0.0459(12) 0.0333(10) -0.0056(9) 0.0070(8) 0.0040(9) 
C12 0.0443(12) 0.0470(12) 0.0360(11) -0.0014(9) 0.0095(9) -0.0072(9) 
C13 0.0373(10) 0.0486(12) 0.0401(11) -0.0042(10) 0.0042(8) 0.0061(9) 
C14 0.0423(12) 0.0518(13) 0.0461(12) -0.0046(10) 0.0064(9) -0.0097(10) 
C15 0.0684(18) 0.0492(16) 0.0733(19) 0.0112(14) -0.0070(16) -0.0032(13) 
C16 0.0696(18) 0.0457(15) 0.0736(19) -0.0074(14) 0.0022(15) -0.0101(13) 
 
_geom_special_details 
; 
 All esds (except the esd in the dihedral angle between two l.s. planes) 
 are estimated using the full covariance matrix.  The cell esds are taken 
 into account individually in the estimation of esds in distances, angles 
 and torsion angles; correlations between esds in cell parameters are only 
 used when they are defined by crystal symmetry.  An approximate (isotropic) 
 treatment of cell esds is used for estimating esds involving l.s. planes. 
; 
 
loop_ 
 _geom_bond_atom_site_label_1 
 _geom_bond_atom_site_label_2 
 _geom_bond_distance 
 _geom_bond_site_symmetry_2 
 _geom_bond_publ_flag 
O1 C7 1.204(2) . ? 
O2 C8 1.203(2) . ? 
O3 C13 1.203(2) . ? 
O4 C14 1.198(3) . ? 
O5 C13 1.322(3) . ? 
O5 C15 1.447(3) . ? 
O6 C14 1.331(3) . ? 
O6 C16 1.444(3) . ? 
N1 C7 1.386(2) . ? 
N1 C8 1.389(2) . ? 
N1 C6 1.437(2) . ? 
N2 C12 1.450(3) . ? 
N2 C11 1.452(3) . ? 
N2 H10 0.84(3) . ? 
C1 C2 1.375(3) . ? 
C1 C6 1.377(3) . ? 
C1 H1 0.97(3) . ? 
C2 C3 1.373(4) . ? 
C2 H2 0.97(3) . ? 
C3 C4 1.372(4) . ? 
C3 H3 0.97(3) . ? 
C4 C5 1.380(3) . ? 
C4 H4 0.96(3) . ? 
C5 C6 1.371(3) . ? 
C5 H5 0.93(3) . ? 
C7 C9 1.515(3) . ? 
C8 C10 1.507(3) . ? 
C9 C10 1.528(3) . ? 
C9 C11 1.557(3) . ? 
C9 H6 0.94(2) . ? 
C10 C12 1.564(3) . ? 
C10 H7 0.95(2) . ? 
C11 C13 1.500(3) . ? 
C11 H8 0.92(2) . ? 
C12 C14 1.502(3) . ? 
C12 H9 0.90(2) . ? 
C15 H11 0.98(3) . ? 
C15 H12 0.96(4) . ? 
C15 H13 0.93(4) . ? 
C16 H14 0.96(3) . ? 
C16 H15 0.97(3) . ? 
C16 H16 1.00(3) . ? 
 
loop_ 
 _geom_angle_atom_site_label_1 
 _geom_angle_atom_site_label_2 
 _geom_angle_atom_site_label_3 
 _geom_angle 
 _geom_angle_site_symmetry_1 
 _geom_angle_site_symmetry_3 
 _geom_angle_publ_flag 
C13 O5 C15 117.09(19) . . ? 
C14 O6 C16 116.7(2) . . ? 
C7 N1 C8 113.15(16) . . ? 
C7 N1 C6 123.22(16) . . ? 
C8 N1 C6 123.60(16) . . ? 
C12 N2 C11 104.65(17) . . ? 
C12 N2 H10 108.7(18) . . ? 
C11 N2 H10 110.2(18) . . ? 
C2 C1 C6 119.0(2) . . ? 
C2 C1 H1 122.1(17) . . ? 
C6 C1 H1 118.9(17) . . ? 
C3 C2 C1 120.5(3) . . ? 
C3 C2 H2 120.4(18) . . ? 
C1 C2 H2 119.1(18) . . ? 
C4 C3 C2 120.1(2) . . ? 
C4 C3 H3 120.4(17) . . ? 
C2 C3 H3 119.5(17) . . ? 
C3 C4 C5 119.9(2) . . ? 
C3 C4 H4 121.5(16) . . ? 
C5 C4 H4 118.5(16) . . ? 
C6 C5 C4 119.4(2) . . ? 
C6 C5 H5 118.6(16) . . ? 
C4 C5 H5 122.0(16) . . ? 
C5 C6 C1 121.0(2) . . ? 
C5 C6 N1 120.07(18) . . ? 
C1 C6 N1 118.91(19) . . ? 
O1 C7 N1 124.06(18) . . ? 
O1 C7 C9 127.74(18) . . ? 
N1 C7 C9 108.20(16) . . ? 
O2 C8 N1 123.96(18) . . ? 
O2 C8 C10 127.87(18) . . ? 
N1 C8 C10 108.17(16) . . ? 
C7 C9 C10 104.81(16) . . ? 
C7 C9 C11 113.17(16) . . ? 
C10 C9 C11 104.17(16) . . ? 
C7 C9 H6 106.0(14) . . ? 
C10 C9 H6 116.0(14) . . ? 
C11 C9 H6 112.6(14) . . ? 
C8 C10 C9 105.43(16) . . ? 
C8 C10 C12 113.34(16) . . ? 
C9 C10 C12 104.33(17) . . ? 
C8 C10 H7 106.7(14) . . ? 
C9 C10 H7 115.7(14) . . ? 
C12 C10 H7 111.3(14) . . ? 
N2 C11 C13 112.99(18) . . ? 
N2 C11 C9 106.63(16) . . ? 
C13 C11 C9 113.31(17) . . ? 
N2 C11 H8 109.1(12) . . ? 
C13 C11 H8 107.4(12) . . ? 
C9 C11 H8 107.3(12) . . ? 
N2 C12 C14 111.87(19) . . ? 
N2 C12 C10 106.60(16) . . ? 
C14 C12 C10 113.42(18) . . ? 
N2 C12 H9 109.5(14) . . ? 
C14 C12 H9 107.5(14) . . ? 
C10 C12 H9 107.8(13) . . ? 
O3 C13 O5 125.2(2) . . ? 
O3 C13 C11 124.3(2) . . ? 
O5 C13 C11 110.46(17) . . ? 
O4 C14 O6 124.8(2) . . ? 
O4 C14 C12 123.8(2) . . ? 
O6 C14 C12 111.38(19) . . ? 
O5 C15 H11 111.0(18) . . ? 
O5 C15 H12 108(2) . . ? 
H11 C15 H12 109(3) . . ? 
O5 C15 H13 107(2) . . ? 
H11 C15 H13 107(3) . . ? 
H12 C15 H13 115(3) . . ? 
O6 C16 H14 113.0(18) . . ? 
O6 C16 H15 108.9(18) . . ? 
H14 C16 H15 110(2) . . ? 
O6 C16 H16 109.4(17) . . ? 
H14 C16 H16 106(2) . . ? 
H15 C16 H16 109(2) . . ? 
 
_diffrn_measured_fraction_theta_max    0.966 
_diffrn_reflns_theta_full              26.97 
_diffrn_measured_fraction_theta_full   0.966 
_refine_diff_density_max    0.215 
_refine_diff_density_min   -0.166 
_refine_diff_density_rms    0.034 
  
  
  
#===END
  
-7   0   0   28.27    0.25
  -7   0   1    0.00    2.02
  -7   0   2   17.51    0.23
  -7   0   3   -0.54    0.97
  -6   0   5    1.68    0.50
  -6   0   4   14.55    0.21
  -5   0   6    6.78    0.17
  -5   0   7   -2.92    0.71
  -4   0   7    0.00    2.09
  -3   0   8    5.22    0.22
  -2   0   9    1.03    0.78
  -2   0   8   20.97    0.25
  -1   0   9   -2.44    0.84
   0   0   9    1.51    0.61
   1   0   9   -2.25    0.91
   2   0   8   12.12    0.18
   3   0   8    2.49    0.39
   4   0   7   -1.60    1.02
   5   0   6    3.76    0.25
   6   0   5   -2.42    0.85
   6   0   4   11.92    0.17
   7   0   0   27.81    0.25
   7   0   1   -0.93    1.25
   7   0   2   -2.21    0.82
   7   0   3   -2.04    0.85
   7   1   3    6.07    0.19
   7   1   2    0.92    0.69
   7   1   1    4.02    0.23
   7   1   0    5.98    0.18
   6   1   4    5.04    0.22
   6   1   5   31.12    0.25
   5   1   6    3.28    0.31
   4   1   7    6.50    0.18
   3   1   8    2.12    0.44
   2   1   8   14.51    0.21
   1   1   9   17.74    0.24
   0   1   9    8.81    0.17
  -1   1   9    4.61    0.27
  -2   1   8    6.09    0.19
  -3   1   8    9.54    0.15
  -4   1   7   10.22    0.15
  -5   1   7    8.42    0.18
  -5   1   6    3.60    0.28
  -6   1   4   15.89    0.23
  -6   1   5   25.01    0.26
  -7   1   3    6.59    0.19
  -7   1   2   19.21    0.26
  -7   1   1    9.37    0.15
  -7   1   0    6.23    0.17
  -7   2   0    2.92    0.31
  -7   2   1    6.78    0.17
  -7   2   2    5.63    0.20
  -7   2   3   24.66    0.26
  -6   2   5   20.36    0.27
  -6   2   4    3.26    0.30
  -5   2   6    3.09    0.31
  -4   2   7    2.51    0.38
  -3   2   8   12.45    0.18
  -2   2   8    4.06    0.25
  -1   2   8    0.85    0.78
  -1   2   9   17.86    0.24
   0   2   9    9.45    0.16
   1   2   8    4.43    0.23
   1   2   9   12.27    0.18
   2   2   8   12.36    0.18
   3   2   8   -2.68    0.79
   4   2   7    2.58    0.37
   5   2   6   11.76    0.17
   6   2   5   16.96    0.25
   6   2   4    5.00    0.21
   7   2   0    3.33    0.28
   7   2   1    8.19    0.15
   7   2   2   -2.02    0.84
   7   2   3    7.80    0.17
   7   3   2    3.46    0.28
   7   3   1    2.68    0.33
   7   3   0    6.15    0.18
   6   3   3    4.08    0.22
   6   3   4    6.92    0.17
   6   3   5   24.59    0.27
   5   3   6   -1.70    1.02
   5   3   5    0.90    1.28
   4   3   7   10.02    0.15
   3   3   8   -2.03    0.94
   3   3   7    0.40    1.06
   2   3   8   11.13    0.17
   1   3   9    1.61    1.18
   1   3   8   12.49    0.19
   0   3   8    5.71    0.20
   0   3   9    4.79    0.25
  -1   3   9    8.29    0.18
  -1   3   8    5.89    0.19
  -2   3   8    6.04    0.19
  -3   3   8    3.98    0.30
  -4   3   7    2.77    0.36
  -5   3   6    8.35    0.16
  -6   3   3   10.30    0.16
  -6   3   4    8.21    0.15
  -6   3   5   19.41    0.28
  -7   3   3    1.95    0.48
  -7   3   2    8.08    0.17
  -7   3   1    8.07    0.16
  -7   3   0    6.14    0.18
  -7   4   0    6.83    0.19
  -7   4   1    9.78    0.15
  -7   4   2   13.43    0.19
  -6   4   5   13.47    0.20
  -6   4   4   22.71    0.26
  -6   4   3   -2.69    0.72
  -5   4   5   11.90    0.18
  -5   4   6    8.08    0.16
  -4   4   7    4.22    0.25
  -3   4   7    9.66    0.14
  -3   4   8    8.32    0.18
  -2   4   8   18.42    0.27
  -1   4   8    3.48    0.29
   0   4   8   12.72    0.19
   1   4   8    4.25    0.25
   2   4   8    3.77    0.28
   3   4   7   -1.44    1.10
   3   4   8    7.68    0.19
   4   4   7    1.85    0.48
   4   4   6    7.76    0.16
   5   4   5    0.00    2.06
   5   4   6    6.14    0.21
   6   4   5    3.74    0.31
   6   4   4   11.45    0.17
   6   4   3    2.87    0.30
   7   4   0    7.42    0.17
   7   4   1    5.08    0.21
   7   4   2    9.04    0.16
   7   5   1    0.59    0.91
   7   5   0   10.73    0.17
   6   5   2    1.20    1.13
   6   5   3    4.19    0.23
   6   5   4   11.79    0.18
   5   5   6    3.00    0.36
   5   5   5    4.30    0.24
   4   5   6   -0.89    0.77
   4   5   7    9.95    0.16
   3   5   7   20.06    0.27
   2   5   8    8.59    0.16
   1   5   8    4.26    0.27
   0   5   8   10.23    0.15
  -1   5   8   18.71    0.27
  -2   5   8    4.13    0.25
  -3   5   7    6.56    0.18
  -4   5   6    6.64    0.17
  -4   5   7    5.30    0.24
  -5   5   6    0.95    0.79
  -5   5   5   10.79    0.15
  -6   5   2    3.83    0.23
  -6   5   3    5.04    0.20
  -6   5   4    6.37    0.19
  -7   5   1    3.66    0.28
  -7   5   0   10.79    0.15
  -6   6   4    5.17    0.23
  -6   6   3   11.93    0.18
  -6   6   2    4.05    0.23
  -6   6   1    0.91    1.31
  -6   6   0    8.06    0.15
  -5   6   4   -0.78    1.43
  -5   6   5   24.68    0.26
  -4   6   6   -1.97    0.95
  -3   6   7   -2.57    0.81
  -2   6   8    6.98    0.20
  -2   6   7   13.05    0.21
  -1   6   8   18.17    0.24
   0   6   8   -1.49    1.19
   1   6   8    9.51    0.16
   2   6   8   20.54    0.28
   2   6   7   26.26    0.25
   3   6   7    9.43    0.16
   4   6   6   14.10    0.21
   5   6   4   10.05    0.15
   5   6   5   17.96    0.26
   6   6   4    3.61    0.31
   6   6   3   -1.25    1.13
   6   6   2    1.13    1.18
   6   6   1    6.39    0.16
   6   6   0    8.05    0.14
   6   7   0    3.29    0.31
   6   7   1    2.69    0.33
   6   7   2    7.63    0.16
   6   7   3   18.09    0.27
   5   7   5   -1.36    1.27
   5   7   4   10.55    0.15
   5   7   3    2.64    0.34
   4   7   5   13.35    0.20
   4   7   6   -0.82    1.52
   3   7   7    6.17    0.22
   3   7   6    4.98    0.22
   2   7   7   19.22    0.27
   1   7   8    2.61    0.44
   1   7   7    0.46    1.69
   0   7   7   -2.90    0.73
   0   7   8   10.83    0.16
  -1   7   8    1.17    0.76
  -1   7   7   31.45    0.25
  -2   7   7   18.62    0.26
  -3   7   7   10.96    0.16
  -3   7   6    2.32    0.40
  -4   7   5    2.41    0.37
  -4   7   6    4.11    0.28
  -5   7   5   16.02    0.22
  -5   7   4    6.42    0.18
  -5   7   3    4.76    0.21
  -6   7   0    3.85    0.26
  -6   7   1   15.77    0.24
  -6   7   2    6.16    0.18
  -6   7   3    9.78    0.15
  -6   8   2    4.84    0.24
  -6   8   1    7.21    0.18
  -6   8   0    8.86    0.16
  -5   8   2   14.74    0.23
  -5   8   3    3.52    0.27
  -5   8   4   13.88    0.19
  -4   8   6   13.72    0.21
  -4   8   5   -0.78    0.82
  -3   8   6    6.93    0.18
  -2   8   7    9.54    0.16
  -2   8   6   16.90    0.23
  -1   8   7   15.45    0.24
   0   8   7   13.19    0.20
   1   8   7   13.13    0.20
   2   8   7   13.11    0.20
   2   8   6    7.76    0.16
   3   8   6   29.13    0.25
   4   8   6   -0.49    1.82
   4   8   5    3.55    0.29
   4   8   4    7.79    0.16
   5   8   2   -2.02    0.83
   5   8   3   18.53    0.27
   5   8   4    1.26    1.17
   6   8   2   -0.97    1.41
   6   8   1   21.86    0.27
   6   8   0    9.20    0.15
   5   9   3    7.60    0.17
   5   9   2   14.58    0.22
   5   9   1    4.32    0.22
   5   9   0    4.99    0.19
   4   9   3   16.73    0.23
   4   9   4   -0.46    1.67
   4   9   5    1.72    0.54
   3   9   6    4.95    0.26
   3   9   5   -3.28    0.64
   2   9   6   14.78    0.21
   1   9   7    5.44    0.23
   1   9   6    1.86    0.46
   0   9   6    8.51    0.16
   0   9   7    9.50    0.16
  -1   9   7   18.28    0.25
  -1   9   6   16.76    0.23
  -2   9   6   13.77    0.21
  -3   9   6    1.52    1.18
  -3   9   5   -1.02    1.30
  -4   9   4    5.33    0.20
  -4   9   5    5.96    0.22
  -5   9   4    7.16    0.18
  -5   9   3    6.46    0.18
  -5   9   2    6.40    0.19
  -5   9   1    4.55    0.22
  -5   9   0    4.50    0.22
  -5  10   0    2.31    0.37
  -5  10   1    3.34    0.28
  -5  10   2    4.24    0.26
  -4  10   4   20.46    0.26
  -4  10   3    8.69    0.15
  -4  10   2    2.64    0.35
  -3  10   4    1.41    0.57
  -3  10   5    5.84    0.21
  -2  10   6   10.36    0.17
  -2  10   5   -0.65    1.52
  -1  10   5    8.60    0.15
  -1  10   6    3.52    0.29
   0  10   6   -0.47    1.77
   1  10   5    9.11    0.15
   1  10   6    1.33    1.20
   2  10   6    3.31    0.34
   2  10   5    1.96    0.45
   3  10   4    5.39    0.21
   3  10   5    8.72    0.16
   4  10   4   11.03    0.17
   4  10   3    5.24    0.20
   4  10   2    6.15    0.18
   5  10   0    2.89    0.30
   5  10   1    7.19    0.17
   5  10   2   10.49    0.16
   4  11   0    1.39    0.57
   4  11   1   10.12    0.15
   4  11   2    4.71    0.23
   4  11   3    4.48    0.24
   3  11   4    1.50    1.12
   3  11   3    1.83    0.47
   3  11   2    3.67    0.24
   2  11   4   11.39    0.18
   2  11   5    3.44    0.31
   1  11   5   -0.81    1.50
   1  11   4    2.97    0.31
   0  11   5    1.82    0.49
   0  11   6   13.85    0.20
  -1  11   6    6.08    0.21
  -1  11   5   -0.47    1.70
  -1  11   4    8.38    0.15
  -2  11   4    7.46    0.16
  -2  11   5    4.03    0.27
  -3  11   4   15.78    0.24
  -3  11   3   13.16    0.19
  -3  11   2    1.03    0.65
  -4  11   0    0.85    0.74
  -4  11   1    9.27    0.15
  -4  11   2    3.38    0.31
  -4  11   3    4.25    0.25
  -4  12   2    2.69    0.39
  -4  12   1    0.00    2.13
  -4  12   0    7.85    0.17
  -3  12   0   -1.03    1.24
  -3  12   1   10.12    0.14
  -3  12   2    5.16    0.21
  -3  12   3    5.85    0.21
  -2  12   4    7.15    0.18
  -2  12   3   12.95    0.20
  -2  12   2   -0.91    1.28
  -1  12   3    2.81    0.33
  -1  12   4   11.99    0.17
  -1  12   5    7.48    0.18
   0  12   5   11.13    0.16
   0  12   4    7.78    0.16
   0  12   3    6.31    0.17
   1  12   3   18.14    0.26
   1  12   4    3.06    0.32
   1  12   5    4.55    0.26
   2  12   4    7.39    0.18
   2  12   3    4.09    0.25
   2  12   2   17.68    0.26
   3  12   0    2.14    0.38
   3  12   1    1.46    1.10
   3  12   2    1.86    0.48
   3  12   3    7.19    0.19
   4  12   1   13.37    0.21
   4  12   0    8.18    0.17
   3  13   2   11.29    0.17
   3  13   1    8.05    0.17
   3  13   0    6.02    0.21
   2  13   0    3.30    0.29
   2  13   1    9.62    0.14
   2  13   2   13.00    0.20
   2  13   3   11.07    0.18
   1  13   4    2.77    0.35
   1  13   3    6.45    0.19
   1  13   2   10.30    0.16
   1  13   1   -1.95    0.88
   1  13   0    4.41    0.22
   0  13   0   -1.98    0.85
   0  13   1    9.64    0.14
   0  13   2    3.63    0.28
   0  13   3    9.22    0.15
   0  13   4    5.50    0.22
  -1  13   4    7.31    0.18
  -1  13   3    9.13    0.15
  -1  13   2    6.22    0.19
  -1  13   1   -1.52    1.03
  -1  13   0    4.35    0.22
  -2  13   0    2.16    0.44
  -2  13   1    2.97    0.32
  -2  13   2   15.38    0.22
  -2  13   3   14.59    0.21
  -3  13   2    2.20    0.47
  -3  13   1   17.88    0.24
  -3  13   0    6.06    0.20
  -2  14   0   -2.66    0.81
  -1  14   0   -0.94    0.84
  -1  14   1   19.51    0.28
  -1  14   2    7.92    0.17
   0  14   2   26.66    0.27
   0  14   1   10.43    0.16
   0  14   0   50.78    0.25
   1  14   0   -2.57    0.84
   1  14   1    8.21    0.18
   1  14   2   39.56    0.26
   2  14   0   -2.48    0.80
  -5   0   0   36.82    0.20
  -5   0   1    0.86    1.01
  -5   0   2   67.35    0.20
  -4   0   4   19.28    0.22
  -4   0   3    1.95    0.31
  -4   0   2   51.50    0.18
  -4   0   1    0.83    0.49
  -4   0   0    0.67    1.03
  -3   0   0  202.54    0.15
  -3   0   1   -1.06    0.79
  -3   0   2   38.06    0.16
  -3   0   3   -1.51    0.70
  -3   0   4   11.29    0.17
  -3   0   5   -1.49    0.39
  -2   0   6   20.24    0.21
  -2   0   5    0.72    1.16
  -2   0   4    1.12    0.42
  -2   0   3    0.82    0.46
  -2   0   2  152.27    0.13
  -2   0   1    1.62    0.26
  -2   0   0   45.19    0.12
  -1   0   0   54.71    0.08
  -1   0   1    3.02    0.09
  -1   0   2  139.13    0.12
  -1   0   3    2.69    0.19
  -1   0   4   41.38    0.16
  -1   0   5   -1.72    0.70
  -1   0   6   36.89    0.20
   0   0   6   21.81    0.21
   0   0   5   -1.44    0.74
   0   0   4   10.98    0.16
   0   0   3    1.00    0.83
   0   0   2    7.05    0.10
   0   0   1   -0.77    0.45
   1   0   0   54.74    0.08
   1   0   1   -1.22    0.42
   1   0   2  190.18    0.12
   1   0   3    0.82    0.49
   1   0   4    6.22    0.10
   1   0   5   -1.62    0.73
   1   0   6   15.09    0.21
   2   0   5    1.14    0.96
   2   0   4   29.28    0.17
   2   0   3    0.98    0.41
   2   0   2   27.30    0.14
   2   0   1    2.08    0.21
   2   0   0   45.13    0.12
   3   0   0  203.40    0.15
   3   0   1    0.00    0.96
   3   0   2   44.10    0.16
   3   0   3   -1.51    0.35
   3   0   4    4.03    0.17
   3   0   5   -2.60    0.58
   4   0   4   18.61    0.21
   4   0   3    3.12    0.21
   4   0   2   93.05    0.18
   4   0   1   -1.70    0.65
   4   0   0   -1.21    0.76
   5   0   0   36.72    0.20
   5   0   1   -1.27    0.85
   5   1   1   12.67    0.20
   5   1   0   11.68    0.17
   4   1   0   26.05    0.18
   4   1   1    5.96    0.11
   4   1   2    1.12    0.94
   4   1   3   15.36    0.20
   4   1   4   35.10    0.20
   3   1   5   37.48    0.20
   3   1   4   15.79    0.20
   3   1   3   19.01    0.18
   3   1   2   23.95    0.16
   3   1   1   19.38    0.16
   3   1   0   29.40    0.15
   2   1   0   34.32    0.12
   2   1   1   17.51    0.14
   2   1   2   35.69    0.14
   2   1   3   66.77    0.15
   2   1   4   37.08    0.17
   2   1   5   18.45    0.20
   1   1   6    5.56    0.15
   1   1   5   29.68    0.18
   1   1   4   24.01    0.16
   1   1   3   71.30    0.14
   1   1   2    4.54    0.11
   1   1   1    9.63    0.12
   1   1   0   44.73    0.09
   0   1   0    1.70    0.08
   0   1   1   42.52    0.08
   0   1   2   72.98    0.11
   0   1   3   11.05    0.14
   0   1   4    8.93    0.13
   0   1   5   20.48    0.19
   0   1   6   11.43    0.17
  -1   1   6   47.35    0.20
  -1   1   5   53.09    0.18
  -1   1   4    6.16    0.11
  -1   1   3   13.84    0.16
  -1   1   2   22.62    0.13
  -1   1   1    7.50    0.11
  -1   1   0   44.08    0.09
  -2   1   0   34.29    0.12
  -2   1   1   22.63    0.13
  -2   1   2   37.31    0.14
  -2   1   3   54.64    0.15
  -2   1   4   60.78    0.17
  -2   1   5   16.71    0.20
  -3   1   5    1.52    0.44
  -3   1   4   51.68    0.18
  -3   1   3   32.91    0.17
  -3   1   2   50.49    0.16
  -3   1   1   43.58    0.15
  -3   1   0   28.96    0.15
  -4   1   0   25.61    0.18
  -4   1   1    8.73    0.13
  -4   1   2    5.04    0.14
  -4   1   3    3.54    0.18
  -4   1   4    8.84    0.13
  -5   1   1   14.08    0.19
  -5   1   0   11.38    0.16
  -5   2   0    5.47    0.14
  -5   2   1   25.03    0.20
  -4   2   4    5.21    0.16
  -4   2   3   39.03    0.19
  -4   2   2   13.66    0.18
  -4   2   1    3.17    0.18
  -4   2   0   11.19    0.17
  -3   2   0    5.48    0.11
  -3   2   1   50.99    0.15
  -3   2   2    9.09    0.13
  -3   2   3   -0.82    1.01
  -3   2   4   22.91    0.19
  -3   2   5   16.13    0.22
  -2   2   5    2.80    0.25
  -2   2   4   25.20    0.18
  -2   2   3   33.95    0.16
  -2   2   2    6.82    0.10
  -2   2   1   13.11    0.15
  -2   2   0   18.54    0.13
  -1   2   0    6.51    0.10
  -1   2   1    5.99    0.09
  -1   2   2    8.54    0.12
  -1   2   3   22.13    0.15
  -1   2   4   39.34    0.16
  -1   2   5    9.73    0.15
  -1   2   6   19.87    0.21
   0   2   6   29.84    0.20
   0   2   5    9.46    0.15
   0   2   4   14.68    0.18
   0   2   3    7.90    0.12
   0   2   2   29.34    0.12
   0   2   1   37.34    0.10
   0   2   0   10.17    0.10
   1   2   0    6.28    0.09
   1   2   1  107.31    0.11
   1   2   2   20.53    0.14
   1   2   3   17.84    0.16
   1   2   4   10.68    0.15
   1   2   5   15.71    0.20
   1   2   6    2.93    0.24
   2   2   5   14.79    0.21
   2   2   4   39.88    0.17
   2   2   3   34.32    0.16
   2   2   2   22.87    0.16
   2   2   1   88.18    0.13
   2   2   0   18.42    0.14
   3   2   0    5.89    0.10
   3   2   1   60.69    0.15
   3   2   2   23.27    0.17
   3   2   3    9.21    0.13
   3   2   4    3.56    0.20
   3   2   5   18.37    0.21
   4   2   3   23.18    0.20
   4   2   2   10.30    0.15
   4   2   1    7.76    0.12
   4   2   0   10.92    0.16
   5   2   0    5.74    0.14
   5   2   1    1.03    0.96
   5   3   0    2.02    0.29
   4   3   0   24.07    0.18
   4   3   1   12.15    0.17
   4   3   2    1.09    0.46
   4   3   3    0.93    1.02
   3   3   4   21.65    0.20
   3   3   3   18.72    0.19
   3   3   2   24.79    0.17
   3   3   1   28.60    0.16
   3   3   0   23.48    0.16
   2   3   0    3.18    0.14
   2   3   1   12.45    0.16
   2   3   2    4.31    0.13
   2   3   3   -1.09    0.81
   2   3   4    8.08    0.12
   2   3   5   21.19    0.20
   1   3   6    4.46    0.18
   1   3   5    2.82    0.23
   1   3   4   16.60    0.18
   1   3   3   11.94    0.18
   1   3   2   23.13    0.14
   1   3   1   63.49    0.12
   1   3   0   59.75    0.11
   0   3   0   -0.51    0.81
   0   3   1   42.59    0.11
   0   3   2    3.01    0.17
   0   3   3   35.99    0.15
   0   3   4    2.96    0.18
   0   3   5   15.11    0.20
   0   3   6    5.38    0.16
  -1   3   6   11.26    0.17
  -1   3   5    8.66    0.13
  -1   3   4   24.70    0.17
  -1   3   3   44.87    0.15
  -1   3   2   13.78    0.15
  -1   3   1   43.37    0.12
  -1   3   0   58.93    0.11
  -2   3   0    4.07    0.12
  -2   3   1   49.14    0.14
  -2   3   2    5.14    0.11
  -2   3   3    2.21    0.23
  -2   3   4   17.96    0.19
  -2   3   5   27.99    0.20
  -3   3   4   13.68    0.19
  -3   3   3   29.09    0.18
  -3   3   2   23.88    0.17
  -3   3   1   41.62    0.16
  -3   3   0   23.44    0.16
  -4   3   0   23.24    0.19
  -4   3   1   43.21    0.18
  -4   3   2    6.26    0.13
  -4   3   3    5.11    0.16
  -5   3   0    1.11    0.91
  -4   4   3   26.42    0.20
  -4   4   2    8.49    0.13
  -4   4   1   -0.51    1.29
  -4   4   0   10.55    0.17
  -3   4   0   22.18    0.17
  -3   4   1   12.58    0.16
  -3   4   2   40.57    0.17
  -3   4   3    1.71    0.33
  -3   4   4    3.04    0.23
  -2   4   5    1.22    0.48
  -2   4   4   16.31    0.20
  -2   4   3    3.62    0.15
  -2   4   2    4.88    0.12
  -2   4   1    7.47    0.11
  -2   4   0   38.98    0.15
  -1   4   0    9.88    0.14
  -1   4   1   20.41    0.14
  -1   4   2   26.53    0.15
  -1   4   3    3.00    0.17
  -1   4   4   28.34    0.18
  -1   4   5    5.68    0.14
   0   4   5    4.80    0.16
   0   4   4   25.18    0.17
   0   4   3   28.63    0.16
   0   4   2   84.75    0.14
   0   4   1    6.57    0.10
   0   4   0   61.78    0.12
   1   4   0    9.73    0.14
   1   4   1   11.85    0.16
   1   4   2   24.23    0.15
   1   4   3   22.73    0.16
   1   4   4   15.04    0.19
   1   4   5   18.17    0.20
   2   4   5    7.29    0.14
   2   4   4   19.21    0.19
   2   4   3    3.29    0.17
   2   4   2    9.52    0.15
   2   4   1   40.71    0.15
   2   4   0   40.00    0.15
   3   4   0   22.24    0.17
   3   4   1   17.83    0.18
   3   4   2   31.00    0.18
   3   4   3    0.87    1.03
   3   4   4   31.76    0.20
   4   4   3   17.34    0.21
   4   4   2   17.93    0.20
   4   4   1    0.36    1.31
   4   4   0   10.88    0.17
   4   5   0   28.48    0.19
   4   5   1   13.83    0.18
   4   5   2   -0.94    1.02
   3   5   4    4.25    0.18
   3   5   3   21.69    0.19
   3   5   2    0.62    0.62
   3   5   1    8.47    0.13
   3   5   0   10.13    0.15
   2   5   0    3.09    0.16
   2   5   1    1.02    0.77
   2   5   2    3.75    0.15
   2   5   3    3.79    0.16
   2   5   4    1.55    0.39
   2   5   5    5.70    0.16
   1   5   5   11.36    0.17
   1   5   4    8.87    0.13
   1   5   3    1.23    0.37
   1   5   2    3.75    0.14
   1   5   1   16.30    0.16
   1   5   0   50.27    0.14
   0   5   0   -1.39    0.65
   0   5   1   50.82    0.14
   0   5   2   34.05    0.15
   0   5   3   17.86    0.17
   0   5   4   33.34    0.18
   0   5   5    8.06    0.12
  -1   5   5   13.49    0.19
  -1   5   4   12.18    0.18
  -1   5   3    5.36    0.12
  -1   5   2   45.10    0.15
  -1   5   1   24.19    0.15
  -1   5   0   50.05    0.14
  -2   5   0    3.63    0.14
  -2   5   1    9.26    0.14
  -2   5   2    9.12    0.13
  -2   5   3   11.56    0.17
  -2   5   4   20.50    0.20
  -2   5   5    5.63    0.15
  -3   5   4   15.76    0.22
  -3   5   3    3.64    0.20
  -3   5   2   12.94    0.18
  -3   5   1   10.87    0.16
  -3   5   0    9.68    0.15
  -4   5   0   27.92    0.19
  -4   5   1    1.65    0.35
  -4   5   2   20.82    0.20
  -4   6   1   18.17    0.21
  -4   6   0   11.11    0.17
  -3   6   0   22.89    0.19
  -3   6   1    9.49    0.13
  -3   6   2    8.04    0.12
  -3   6   3   18.66    0.21
  -2   6   4   15.28    0.21
  -2   6   3    3.44    0.19
  -2   6   2   18.96    0.18
  -2   6   1   19.02    0.18
  -2   6   0    4.99    0.12
  -1   6   0   34.83    0.16
  -1   6   1   22.85    0.16
  -1   6   2   15.92    0.18
  -1   6   3    9.19    0.13
  -1   6   4    5.32    0.15
  -1   6   5    9.32    0.14
   0   6   5   10.39    0.15
   0   6   4   29.91    0.19
   0   6   3   49.06    0.17
   0   6   2   44.44    0.16
   0   6   1   46.56    0.15
   0   6   0   14.93    0.17
   1   6   0   35.67    0.16
   1   6   1   20.97    0.16
   1   6   2   45.03    0.17
   1   6   3    4.48    0.14
   1   6   4    8.94    0.13
   1   6   5   42.86    0.20
   2   6   4   12.20    0.17
   2   6   3   15.06    0.21
   2   6   2   32.87    0.18
   2   6   1    9.49    0.15
   2   6   0    4.78    0.12
   3   6   0   23.16    0.19
   3   6   1   32.35    0.18
   3   6   2   13.52    0.18
   3   6   3   22.30    0.21
   4   6   1   10.85    0.17
   4   6   0   11.48    0.16
   3   7   2   10.87    0.17
   3   7   1    9.62    0.15
   3   7   0   14.66    0.21
   2   7   0    7.28    0.11
   2   7   1   76.82    0.18
   2   7   2   24.67    0.19
   2   7   3    1.05    1.05
   1   7   4    8.42    0.14
   1   7   3   49.04    0.18
   1   7   2   -0.48    1.23
   1   7   1   23.38    0.17
   1   7   0    2.67    0.19
   0   7   0   -1.63    0.61
   0   7   1   27.87    0.17
   0   7   2    1.23    0.39
   0   7   3   43.50    0.18
   0   7   4   16.82    0.21
  -1   7   4   15.24    0.22
  -1   7   3   14.40    0.20
  -1   7   2   11.56    0.18
  -1   7   1   12.12    0.17
  -1   7   0    2.82    0.18
  -2   7   0    7.09    0.11
  -2   7   1   31.78    0.18
  -2   7   2    4.98    0.14
  -2   7   3   25.48    0.20
  -3   7   2   -0.80    0.60
  -3   7   1    1.05    0.97
  -3   7   0   14.24    0.21
  -3   8   0   25.89    0.20
  -3   8   1   19.59    0.21
  -2   8   3    9.36    0.13
  -2   8   2   21.80    0.20
  -2   8   1   31.09    0.19
  -2   8   0   12.45    0.19
  -1   8   0   14.18    0.20
  -1   8   1   33.55    0.18
  -1   8   2    3.20    0.21
  -1   8   3   12.06    0.17
   0   8   3   50.28    0.19
   0   8   2    9.88    0.14
   0   8   1   41.90    0.18
   0   8   0   55.12    0.18
   1   8   0   13.80    0.20
   1   8   1   36.46    0.18
   1   8   2   25.51    0.19
   1   8   3   54.31    0.19
   2   8   3    5.02    0.16
   2   8   2    2.03    0.33
   2   8   1    8.64    0.13
   2   8   0   12.65    0.18
   3   8   0   26.32    0.20
   3   8   1   26.22    0.21
   2   9   0    5.04    0.15
   2   9   1    4.01    0.17
   1   9   2    4.79    0.16
   1   9   1   13.78    0.18
   1   9   0   30.40    0.19
   0   9   0   -2.35    0.64
   0   9   1    4.86    0.16
   0   9   2   15.36    0.21
  -1   9   2   13.39    0.19
  -1   9   1   18.59    0.20
  -1   9   0   30.39    0.19
  -2   9   0    5.40    0.15
  -2   9   1    2.07    0.31
   0  10   0   15.68    0.22
  -6   0   3    1.48    0.53
  -6   0   2   23.91    0.23
  -6   0   1   -2.08    0.77
  -6   0   0   35.77    0.22
  -5   0   3    0.40    0.92
  -5   0   4    5.98    0.17
  -5   0   5    0.44    1.53
  -4   0   6   21.61    0.24
  -4   0   5    1.58    0.43
  -3   0   6   13.41    0.19
  -3   0   7   -0.76    1.42
  -2   0   7   -1.64    0.91
  -1   0   7    1.01    0.63
  -1   0   8   21.07    0.25
   0   0   8   25.10    0.25
   0   0   7    1.16    0.55
   1   0   7   -1.21    0.55
   1   0   8   16.02    0.23
   2   0   7   -0.95    1.21
   2   0   6    2.11    0.32
   3   0   6   15.00    0.21
   3   0   7   -1.55    0.51
   4   0   6    9.70    0.14
   4   0   5   -1.01    1.14
   5   0   2   54.62    0.20
   5   0   3    1.15    0.56
   5   0   4   12.84    0.18
   5   0   5   -0.77    1.37
   6   0   3   -2.73    0.67
   6   0   2    1.56    0.45
   6   0   1    1.04    0.57
   6   0   0   36.22    0.22
   6   1   0    5.92    0.16
   6   1   1   -0.85    1.19
   6   1   2    6.84    0.15
   6   1   3   -1.09    1.20
   5   1   5   21.55    0.25
   5   1   4   26.21    0.22
   5   1   3   33.94    0.21
   5   1   2    4.59    0.17
   4   1   5    1.37    0.48
   4   1   6    6.61    0.16
   3   1   7    1.45    0.52
   3   1   6    6.32    0.16
   2   1   6   14.44    0.20
   2   1   7    4.53    0.21
   1   1   8   -1.48    1.12
   1   1   7   -1.85    0.83
   0   1   7    5.49    0.18
   0   1   8   -0.63    1.56
  -1   1   8   10.89    0.15
  -1   1   7   19.89    0.23
  -2   1   6    7.23    0.14
  -2   1   7   14.16    0.22
  -3   1   7    5.78    0.19
  -3   1   6   11.08    0.17
  -4   1   5   17.12    0.23
  -4   1   6    6.46    0.17
  -5   1   5    2.04    0.40
  -5   1   4   26.67    0.23
  -5   1   3   38.95    0.21
  -5   1   2    4.63    0.18
  -6   1   0    5.91    0.16
  -6   1   1   13.39    0.20
  -6   1   2   35.79    0.23
  -6   1   3   29.97    0.24
  -6   2   3    4.40    0.23
  -6   2   2    2.08    0.38
  -6   2   1    7.32    0.15
  -6   2   0    5.62    0.17
  -5   2   2    2.79    0.26
  -5   2   3   22.97    0.22
  -5   2   4    2.43    0.33
  -5   2   5    8.07    0.15
  -4   2   6   10.52    0.16
  -4   2   5   11.51    0.17
  -3   2   6   13.85    0.21
  -3   2   7    0.86    0.76
  -2   2   7    1.21    1.10
  -2   2   6   10.22    0.16
  -1   2   7   23.49    0.23
   0   2   8    4.05    0.25
   0   2   7   15.54    0.20
   1   2   7    7.27    0.15
   2   2   7    5.64    0.18
   2   2   6   30.58    0.21
   3   2   6   15.07    0.21
   3   2   7    3.57    0.27
   4   2   6   -1.58    0.97
   4   2   5    1.71    0.42
   4   2   4   14.07    0.20
   5   2   2   -0.89    1.15
   5   2   3    5.19    0.17
   5   2   4   26.12    0.23
   5   2   5    2.90    0.32
   6   2   3   15.26    0.23
   6   2   2    3.26    0.24
   6   2   1    2.90    0.28
   6   2   0    5.95    0.16
   6   3   0    2.90    0.32
   6   3   1    7.41    0.15
   6   3   2   15.92    0.22
   5   3   4    7.60    0.15
   5   3   3   -0.94    0.61
   5   3   2    6.92    0.14
   5   3   1    6.51    0.14
   4   3   4   20.95    0.22
   4   3   5    9.70    0.14
   4   3   6    7.27    0.16
   3   3   6    4.99    0.20
   3   3   5    9.62    0.14
   2   3   6   14.17    0.21
   2   3   7    3.07    0.28
   1   3   7   18.96    0.24
   0   3   7    4.20    0.23
  -1   3   7    5.05    0.20
  -2   3   6    9.06    0.12
  -2   3   7    2.37    0.36
  -3   3   7    2.79    0.34
  -3   3   6   21.56    0.23
  -3   3   5   10.69    0.16
  -4   3   4   -1.58    0.84
  -4   3   5    3.07    0.27
  -4   3   6   12.52    0.19
  -5   3   5    8.80    0.14
  -5   3   4    1.42    1.15
  -5   3   3   13.14    0.19
  -5   3   2    3.73    0.20
  -5   3   1   15.35    0.22
  -6   3   0    4.19    0.20
  -6   3   1   12.45    0.18
  -6   3   2    9.33    0.14
  -6   4   2    6.35    0.16
  -6   4   1    4.63    0.20
  -6   4   0   15.10    0.22
  -5   4   0   29.18    0.21
  -5   4   1    8.52    0.12
  -5   4   2    7.62    0.13
  -5   4   3    6.18    0.16
  -5   4   4    4.08    0.22
  -4   4   6   11.39    0.18
  -4   4   5   10.48    0.15
  -4   4   4   26.44    0.21
  -3   4   5    9.32    0.14
  -3   4   6   19.17    0.24
  -2   4   7   12.26    0.17
  -2   4   6    2.02    0.36
  -1   4   6   14.45    0.20
  -1   4   7    6.26    0.16
   0   4   7   21.87    0.23
   0   4   6    9.50    0.14
   1   4   6    5.41    0.16
   1   4   7    4.46    0.23
   2   4   7    5.88    0.19
   2   4   6   16.96    0.24
   3   4   5   13.03    0.19
   3   4   6   12.23    0.17
   4   4   5    7.81    0.15
   4   4   4    1.93    0.38
   5   4   0   29.15    0.21
   5   4   1   14.74    0.20
   5   4   2    2.05    0.33
   5   4   3    3.11    0.25
   5   4   4    9.64    0.14
   6   4   2   12.20    0.18
   6   4   1   10.47    0.15
   6   4   0   15.61    0.21
   6   5   0    4.99    0.21
   6   5   1    6.82    0.16
   5   5   4    8.95    0.14
   5   5   3    5.29    0.19
   5   5   2   14.33    0.21
   5   5   1    4.11    0.20
   5   5   0   14.38    0.21
   4   5   3    5.23    0.16
   4   5   4    5.49    0.17
   4   5   5    6.48    0.16
   3   5   6    4.92    0.21
   3   5   5    6.17    0.16
   2   5   6    4.27    0.21
   2   5   7    2.80    0.33
   1   5   7   12.49    0.17
   1   5   6    1.00    1.18
   0   5   6    3.36    0.24
   0   5   7   19.83    0.24
  -1   5   7    6.92    0.16
  -1   5   6   13.54    0.21
  -2   5   6    8.89    0.14
  -2   5   7    7.07    0.17
  -3   5   6   -2.60    0.72
  -3   5   5    5.21    0.18
  -4   5   3    3.89    0.23
  -4   5   4    7.04    0.15
  -4   5   5   -2.07    0.79
  -5   5   4    8.51    0.15
  -5   5   3    2.65    0.30
  -5   5   2    3.93    0.21
  -5   5   1    4.19    0.19
  -5   5   0   14.49    0.20
  -6   5   0    5.39    0.18
  -6   5   1   -0.63    1.43
  -5   6   0   12.21    0.17
  -5   6   1   17.75    0.24
  -5   6   2   11.77    0.17
  -5   6   3    6.27    0.16
  -4   6   5   -1.53    1.03
  -4   6   4    3.65    0.24
  -4   6   3   18.22    0.23
  -4   6   2    3.54    0.20
  -3   6   4   -2.57    0.63
  -3   6   5   35.92    0.22
  -3   6   6   -2.80    0.75
  -2   6   6   14.89    0.22
  -2   6   5   35.71    0.21
  -1   6   6    6.35    0.16
  -1   6   7   22.78    0.25
   0   6   7   -3.28    0.64
   0   6   6    7.10    0.15
   1   6   6   19.58    0.23
   1   6   7    9.58    0.15
   2   6   6    4.72    0.21
   2   6   5   28.51    0.22
   3   6   4   13.63    0.21
   3   6   5    2.69    0.30
   3   6   6   13.80    0.21
   4   6   5   20.50    0.25
   4   6   4    4.72    0.19
   4   6   3    4.32    0.18
   4   6   2    1.76    0.34
   5   6   0   12.46    0.19
   5   6   1   -0.73    1.31
   5   6   2   25.90    0.23
   5   6   3   15.19    0.22
   5   7   2    8.12    0.15
   5   7   1   45.18    0.23
   5   7   0    8.99    0.14
   4   7   0    5.85    0.15
   4   7   1    5.72    0.15
   4   7   2    7.31    0.14
   4   7   3    8.22    0.13
   4   7   4    3.74    0.25
   3   7   5    5.80    0.18
   3   7   4   -1.75    0.84
   3   7   3   33.92    0.21
   2   7   4   20.25    0.22
   2   7   5   -1.17    1.09
   2   7   6   14.53    0.21
   1   7   6   -2.50    0.80
   1   7   5   20.70    0.22
   0   7   5   10.87    0.16
   0   7   6   20.32    0.24
  -1   7   6    8.94    0.14
  -1   7   5    4.17    0.19
  -2   7   4    7.40    0.13
  -2   7   5   21.36    0.23
  -2   7   6   16.86    0.22
  -3   7   5   27.45    0.23
  -3   7   4    1.78    0.42
  -3   7   3   39.58    0.20
  -4   7   0    5.56    0.16
  -4   7   1   13.80    0.20
  -4   7   2    1.15    0.96
  -4   7   3   13.57    0.22
  -4   7   4   11.06    0.16
  -5   7   2    1.80    0.42
  -5   7   1    2.18    0.35
  -5   7   0    8.85    0.13
  -5   8   0   -1.40    1.05
  -5   8   1   23.70    0.24
  -4   8   4    9.19    0.14
  -4   8   3   12.27    0.17
  -4   8   2   -1.74    0.79
  -4   8   1   15.40    0.21
  -4   8   0    5.43    0.16
  -3   8   2    0.40    1.44
  -3   8   3   32.16    0.22
  -3   8   4    3.75    0.24
  -3   8   5   14.43    0.22
  -2   8   5   19.46    0.24
  -2   8   4   12.02    0.18
  -1   8   4   11.18    0.18
  -1   8   5    5.02    0.19
  -1   8   6   -2.10    0.44
   0   8   6   15.78    0.23
   0   8   5    6.54    0.15
   0   8   4    5.99    0.15
   1   8   4   14.67    0.20
   1   8   5   10.20    0.15
   1   8   6   19.45    0.25
   2   8   5   28.59    0.23
   2   8   4   19.22    0.23
   3   8   2   11.94    0.17
   3   8   3   17.18    0.23
   3   8   4    2.06    0.38
   3   8   5   12.23    0.18
   4   8   3   25.25    0.24
   4   8   2   10.05    0.16
   4   8   1   26.62    0.22
   4   8   0    5.48    0.16
   5   8   0   -0.44    1.61
   5   8   1    5.26    0.20
   4   9   0   22.11    0.23
   4   9   1   10.46    0.16
   4   9   2    8.47    0.14
   3   9   4    5.93    0.18
   3   9   3   17.47    0.24
   3   9   2   13.53    0.19
   3   9   1   12.85    0.18
   3   9   0    8.24    0.12
   2   9   2    8.21    0.12
   2   9   3    6.53    0.15
   2   9   4    6.38    0.16
   2   9   5    5.97    0.20
   1   9   5    4.55    0.22
   1   9   4   12.83    0.20
   1   9   3   15.58    0.22
   0   9   3   28.26    0.20
   0   9   4   -1.08    1.14
   0   9   5   -0.61    1.47
  -1   9   5    8.04    0.15
  -1   9   4    3.03    0.27
  -1   9   3   12.91    0.20
  -2   9   2    1.19    0.49
  -2   9   3    8.86    0.14
  -2   9   4   19.35    0.23
  -2   9   5   14.46    0.21
  -3   9   4    0.00    1.99
  -3   9   3   18.74    0.24
  -3   9   2    1.99    0.35
  -3   9   1    9.69    0.15
  -3   9   0    7.79    0.13
  -4   9   0   21.63    0.24
  -4   9   1    6.34    0.16
  -4   9   2    3.99    0.22
  -4   9   3   10.78    0.15
  -4  10   1    4.45    0.21
  -4  10   0   12.00    0.17
  -3  10   0    2.39    0.31
  -3  10   1   13.34    0.19
  -3  10   2   12.66    0.20
  -3  10   3   -2.69    0.77
  -2  10   4   11.56    0.18
  -2  10   3   11.68    0.16
  -2  10   2   20.85    0.23
  -2  10   1    2.77    0.26
  -2  10   0   21.51    0.22
  -1  10   0   24.23    0.21
  -1  10   1    3.65    0.21
  -1  10   2   13.92    0.20
  -1  10   3   -2.56    0.69
  -1  10   4   17.78    0.25
   0  10   5    9.82    0.14
   0  10   4   10.71    0.16
   0  10   3    3.42    0.24
   0  10   2    2.68    0.28
   0  10   1    3.66    0.20
   1  10   0   24.78    0.21
   1  10   1   16.06    0.22
   1  10   2   37.13    0.21
   1  10   3    7.26    0.15
   1  10   4    5.05    0.19
   2  10   4   25.82    0.24
   2  10   3    8.61    0.15
   2  10   2    7.50    0.14
   2  10   1    9.02    0.14
   2  10   0   21.92    0.22
   3  10   0    0.60    1.33
   3  10   1    3.05    0.26
   3  10   2   31.95    0.23
   3  10   3    2.82    0.31
   4  10   1   -1.10    0.60
   4  10   0   12.26    0.18
   3  11   1    6.77    0.16
   3  11   0    4.34    0.21
   2  11   0    3.14    0.25
   2  11   1    2.40    0.34
   2  11   2    5.46    0.18
   2  11   3    8.07    0.15
   1  11   3    2.29    0.37
   1  11   2    3.75    0.23
   1  11   1   15.22    0.21
   1  11   0    9.07    0.14
   0  11   0    0.69    0.71
   0  11   1    5.18    0.17
   0  11   2   10.48    0.16
   0  11   3   20.71    0.24
   0  11   4    6.25    0.18
  -1  11   3   11.11    0.17
  -1  11   2    8.65    0.14
  -1  11   1   18.06    0.23
  -1  11   0    9.16    0.14
  -2  11   0    3.11    0.26
  -2  11   1   -2.18    0.72
  -2  11   2   11.38    0.17
  -2  11   3    6.89    0.16
  -3  11   1   16.04    0.22
  -3  11   0    4.08    0.22
  -2  12   1    9.01    0.15
  -2  12   0    2.67    0.33
  -1  12   0    4.18    0.21
  -1  12   1   13.79    0.21
  -1  12   2   -1.33    1.11
   0  12   2    5.43    0.19
   0  12   1    7.59    0.15
   0  12   0   13.97    0.22
   1  12   0    3.40    0.25
   1  12   1   16.90    0.24
   1  12   2    6.69    0.16
   2  12   1    7.60    0.15
   2  12   0    3.24    0.26
  -8   0   2    6.24    0.20
  -8   0   1   -1.01    1.26
  -8   0   0    6.75    0.19
  -7   0   4    4.54    0.25
  -7   0   5    0.00    2.07
  -6   0   7    1.41    0.62
  -6   0   6   11.48    0.18
  -5   0   8   22.39    0.28
  -4   0   9    1.48    0.61
  -4   0   8   -3.28    0.72
  -3   0   9   -2.60    0.81
  -1   0  10   23.75    0.29
   0   0  10   17.33    0.26
   1   0  10   -0.72    1.67
   2   0   9    0.49    1.78
   3   0   9   -1.66    1.11
   4   0   8    8.03    0.18
   5   0   7   -0.69    1.54
   5   0   8    5.20    0.25
   6   0   7    0.63    0.98
   6   0   6    7.31    0.19
   7   0   4    3.24    0.31
   7   0   5   -1.84    1.09
   8   0   2   18.98    0.25
   8   0   1    1.01    1.24
   8   0   0    6.99    0.18
   8   1   0    3.40    0.31
   8   1   1    4.19    0.27
   8   1   2    3.67    0.29
   7   1   5    6.03    0.21
   7   1   4    2.83    0.35
   6   1   6   12.91    0.19
   6   1   7    3.74    0.29
   5   1   8    4.27    0.29
   5   1   7    3.55    0.32
   4   1   8    8.79    0.17
   3   1   9    7.28    0.19
   2   1   9    7.82    0.19
   1   1  10    1.81    0.57
   0   1  10    5.35    0.24
  -1   1  10   10.08    0.17
  -2   1   9   -2.39    0.90
  -3   1   9   -1.87    0.96
  -4   1   8    8.62    0.17
  -4   1   9    1.96    0.53
  -5   1   8    3.87    0.29
  -6   1   6    7.97    0.18
  -6   1   7    8.21    0.18
  -7   1   5    5.51    0.23
  -7   1   4   21.15    0.28
  -8   1   0    3.71    0.28
  -8   1   1   -0.88    1.37
  -8   1   2    1.26    1.24
  -8   2   2    0.73    1.56
  -8   2   1   11.75    0.17
  -8   2   0    3.81    0.28
  -7   2   4    2.42    0.42
  -7   2   5    3.52    0.31
  -6   2   7    9.07    0.17
  -6   2   6    6.63    0.19
  -5   2   7   16.25    0.24
  -5   2   8    1.39    0.65
  -4   2   8   -1.90    0.99
  -3   2   9    1.49    0.60
  -2   2   9   17.68    0.25
  -1   2  10    6.96    0.21
   0   2  10    3.97    0.35
   1   2  10   17.93    0.26
   2   2   9   14.69    0.21
   3   2   9    7.06    0.19
   4   2   8    0.40    1.11
   5   2   7   -2.99    0.72
   5   2   8   17.78    0.27
   6   2   6   -3.52    0.69
   7   2   4    7.72    0.17
   7   2   5    4.07    0.29
   8   2   2    2.30    0.41
   8   2   1   10.98    0.16
   8   2   0    3.90    0.28
   8   3   0    3.89    0.27
   8   3   1    7.12    0.18
   8   3   2    0.52    1.64
   7   3   5    4.80    0.25
   7   3   4    1.64    0.54
   7   3   3   14.66    0.21
   6   3   6    7.94    0.18
   5   3   7    6.87    0.19
   4   3   8    6.71    0.19
   3   3   9    4.07    0.29
   2   3   9    5.22    0.24
   1   3  10   10.14    0.17
   0   3  10   13.86    0.21
  -1   3  10   -2.59    0.90
  -2   3   9    9.78    0.16
  -3   3   9    2.35    0.46
  -4   3   8   -1.78    0.96
  -5   3   8    2.60    0.41
  -5   3   7    1.10    1.36
  -6   3   6    4.75    0.25
  -7   3   5    8.21    0.17
  -7   3   4    9.32    0.16
  -8   3   0    3.99    0.27
  -8   3   1    6.57    0.20
  -8   3   2    3.19    0.33
  -8   4   1    2.36    0.43
  -8   4   0    4.64    0.23
  -7   4   3    8.06    0.17
  -7   4   4   13.71    0.20
  -7   4   5    1.16    1.24
  -6   4   6   13.30    0.19
  -5   4   7   12.58    0.19
  -4   4   8    6.58    0.19
  -3   4   9    9.18    0.18
  -2   4   9    1.22    1.29
  -1   4   9    1.04    0.82
   0   4   9   10.64    0.17
   1   4   9    4.31    0.27
   2   4   9    9.61    0.16
   3   4   9    4.67    0.28
   4   4   8    4.95    0.25
   5   4   7    0.71    1.52
   6   4   6    1.43    1.27
   7   4   3    4.70    0.23
   7   4   4    1.15    0.70
   8   4   1   -2.37    0.79
   8   4   0    6.55    0.19
   7   5   4    7.22    0.19
   7   5   3   -1.87    1.00
   7   5   2    2.34    0.41
   6   5   5    4.38    0.27
   6   5   6    9.86    0.16
   5   5   7    3.84    0.31
   4   5   8    3.36    0.34
   3   5   9   10.93    0.17
   3   5   8   11.12    0.16
   2   5   9   13.59    0.20
   1   5   9   -1.22    1.33
   0   5   9    4.02    0.30
  -1   5   9   36.52    0.27
  -2   5   9   11.59    0.16
  -3   5   9    1.15    0.77
  -3   5   8    1.80    0.57
  -4   5   8    8.74    0.18
  -5   5   7   10.46    0.16
  -6   5   5    9.02    0.17
  -6   5   6    2.19    0.46
  -7   5   4    8.48    0.18
  -7   5   3   -1.93    1.00
  -7   5   2    3.78    0.29
  -7   6   0    6.69    0.18
  -7   6   1    1.21    1.22
  -7   6   2   14.54    0.23
  -7   6   3   23.47    0.28
  -7   6   4    4.00    0.29
  -6   6   6   -0.52    1.72
  -6   6   5   25.57    0.28
  -5   6   6    1.30    1.22
  -5   6   7   15.55    0.22
  -4   6   8   13.49    0.21
  -4   6   7   12.57    0.18
  -3   6   8    1.15    0.73
  -2   6   9    3.97    0.31
  -1   6   9    8.86    0.18
   0   6   9   14.59    0.22
   1   6   9    9.59    0.17
   2   6   9    3.60    0.32
   3   6   8    0.70    1.64
   4   6   8    7.91    0.18
   4   6   7    8.13    0.18
   5   6   6    9.76    0.17
   5   6   7   23.31    0.29
   6   6   5   22.95    0.28
   7   6   0    6.82    0.18
   7   6   1    7.28    0.18
   7   6   2    2.01    0.46
   7   6   3    7.15    0.19
   7   7   3    4.23    0.29
   7   7   2   -0.51    1.76
   7   7   1    7.32    0.18
   7   7   0   -1.87    0.88
   6   7   4    3.16    0.33
   6   7   5    6.47    0.21
   5   7   6    5.50    0.23
   4   7   7    2.53    0.41
   3   7   8    5.06    0.25
   2   7   8    0.76    0.94
   1   7   9   -0.73    1.66
   0   7   9   19.81    0.29
  -1   7   9   15.12    0.22
  -2   7   8   17.29    0.25
  -3   7   8    5.61    0.23
  -4   7   7   15.44    0.23
  -5   7   6   12.05    0.17
  -6   7   4    7.92    0.18
  -6   7   5   21.96    0.29
  -7   7   3    1.15    1.29
  -7   7   2    7.26    0.20
  -7   7   1    9.61    0.16
  -7   7   0    0.87    1.39
  -7   8   0    1.80    0.49
  -7   8   1    6.48    0.20
  -7   8   2    6.98    0.19
  -6   8   5   18.23    0.26
  -6   8   4    8.47    0.17
  -6   8   3   17.80    0.24
  -5   8   5   17.73    0.25
  -5   8   6    2.86    0.40
  -4   8   7    5.14    0.24
  -3   8   7    9.66    0.17
  -3   8   8    8.78    0.18
  -2   8   8   15.44    0.24
  -1   8   8   25.46    0.28
   0   8   8    4.53    0.28
   1   8   8   15.51    0.23
   2   8   8   22.56    0.28
   3   8   7   12.45    0.18
   3   8   8   10.15    0.17
   4   8   7   12.70    0.19
   5   8   5   27.41    0.27
   5   8   6    7.24    0.20
   6   8   4    2.92    0.36
   6   8   3   15.89    0.24
   7   8   0    1.40    0.61
   7   8   1    7.89    0.18
   7   8   2   -1.79    0.98
   6   9   0    4.00    0.26
   6   9   1   10.78    0.16
   6   9   2    7.33    0.18
   6   9   3    9.00    0.17
   6   9   4    3.50    0.33
   5   9   5   24.69    0.28
   5   9   4    2.75    0.37
   4   9   6    0.90    0.85
   3   9   7   13.75    0.22
   2   9   7    6.03    0.23
   2   9   8   -1.63    1.20
   1   9   8    7.46    0.19
   0   9   8   20.12    0.29
  -1   9   8   16.63    0.23
  -2   9   7   17.45    0.25
  -2   9   8    1.95    0.53
  -3   9   7    3.63    0.30
  -4   9   6   18.13    0.25
  -5   9   5    3.84    0.30
  -6   9   0    3.67    0.28
  -6   9   1    5.31    0.21
  -6   9   2    5.90    0.21
  -6   9   3   12.78    0.19
  -6   9   4    3.54    0.33
  -6  10   3    3.47    0.33
  -6  10   2   -2.10    1.02
  -6  10   1    2.45    0.39
  -6  10   0    8.77    0.17
  -5  10   3    2.09    0.45
  -5  10   4    2.23    0.44
  -5  10   5   -1.46    1.11
  -4  10   6    8.37    0.18
  -4  10   5    6.61    0.20
  -3  10   6   22.45    0.27
  -3  10   7    5.48    0.23
  -2  10   7    7.52    0.18
  -1  10   7   10.51    0.17
   0  10   8    7.99    0.19
   0  10   7   14.19    0.22
   1  10   7    8.15    0.18
   2  10   7    5.89    0.23
   3  10   6    1.40    1.28
   3  10   7    1.27    1.25
   4  10   6    5.26    0.23
   4  10   5    4.11    0.27
   5  10   3    8.48    0.18
   5  10   4    2.65    0.37
   5  10   5    1.04    1.42
   6  10   3    2.60    0.39
   6  10   2    8.05    0.18
   6  10   1    3.59    0.29
   6  10   0    9.17    0.16
   6  11   0    3.24    0.33
   6  11   1    0.64    0.93
   5  11   4    6.73    0.20
   5  11   3    7.19    0.18
   5  11   2    9.39    0.16
   5  11   1   -0.69    1.52
   5  11   0    4.90    0.23
   4  11   4   10.85    0.17
   4  11   5    1.14    1.27
   3  11   6    7.12    0.19
   3  11   5    8.38    0.17
   2  11   6    2.96    0.35
   2  11   7    4.20    0.29
   1  11   7    9.23    0.18
   1  11   6    4.12    0.29
   0  11   7    0.51    1.84
  -1  11   7    3.24    0.35
  -2  11   6    3.02    0.35
  -2  11   7   12.27    0.18
  -3  11   6    1.78    0.58
  -3  11   5    5.85    0.21
  -4  11   4   13.36    0.20
  -4  11   5    7.40    0.19
  -5  11   4    9.77    0.17
  -5  11   3    1.44    0.60
  -5  11   2   -2.32    0.81
  -5  11   1    5.74    0.20
  -5  11   0    4.31    0.26
  -6  11   0    3.50    0.30
  -6  11   1    4.24    0.27
  -5  12   0   10.20    0.15
  -5  12   1    2.37    0.41
  -5  12   2    9.31    0.17
  -4  12   4    3.87    0.30
  -4  12   3    2.28    0.44
  -3  12   4    6.85    0.18
  -3  12   5    0.51    1.83
  -2  12   6    7.42    0.19
  -2  12   5    5.75    0.22
  -1  12   6    5.01    0.24
   0  12   6    7.68    0.19
   1  12   6    2.28    0.47
   2  12   6   12.71    0.17
   2  12   5    0.99    1.35
   3  12   4    6.08    0.20
   3  12   5    0.88    1.51
   4  12   4    2.65    0.39
   4  12   3    8.05    0.17
   4  12   2   -1.38    1.13
   5  12   0   10.37    0.16
   5  12   1    0.72    1.52
   5  12   2    2.79    0.38
   4  13   0    2.05    0.45
   4  13   1    6.35    0.20
   4  13   2    1.01    1.42
   4  13   3    0.79    0.88
   3  13   4    1.18    0.71
   3  13   3    4.88    0.25
   2  13   4    5.68    0.22
   2  13   5   10.23    0.17
   1  13   5    7.46    0.18
   0  13   5   -1.32    1.18
   0  13   6    1.15    0.74
  -1  13   5   -2.13    0.90
  -2  13   4    1.68    0.53
  -2  13   5    1.78    0.54
  -3  13   4   12.59    0.18
  -3  13   3    5.47    0.22
  -4  13   0   -1.00    1.44
  -4  13   1    8.77    0.16
  -4  13   2    9.89    0.16
  -4  13   3    9.10    0.17
  -4  14   1    4.02    0.30
  -4  14   0    7.91    0.19
  -3  14   0   36.56    0.27
  -3  14   1   20.31    0.29
  -3  14   2   12.80    0.18
  -3  14   3   16.61    0.26
  -2  14   4    1.61    0.58
  -2  14   3    7.86    0.18
  -2  14   2   26.93    0.27
  -2  14   1    5.78    0.23
  -1  14   3    5.07    0.23
  -1  14   4    3.48    0.31
   0  14   5    4.05    0.28
   0  14   4    8.41    0.17
   0  14   3   13.75    0.22
   1  14   3    3.81    0.30
   1  14   4   -1.75    1.05
   2  14   4   14.92    0.22
   2  14   3    4.28    0.28
   2  14   2    3.50    0.32
   2  14   1   18.74    0.24
   3  14   0   37.08    0.27
   3  14   1    3.02    0.37
   3  14   2   10.39    0.15
   3  14   3   14.48    0.21
   4  14   0    7.57    0.19
   2  15   0   14.98    0.23
   2  15   1    5.71    0.22
   2  15   2    2.01    0.47
   1  15   3    3.16    0.33
   1  15   2   13.00    0.21
   1  15   1    7.57    0.19
   1  15   0   20.59    0.28
   0  15   0   -3.71    0.74
   0  15   1    5.68    0.23
   0  15   2   22.06    0.29
   0  15   3   -1.45    1.19
  -1  15   3   -3.56    0.64
  -1  15   2   -1.24    1.25
  -1  15   1    4.32    0.27
  -1  15   0   20.68    0.28
  -2  15   0   14.58    0.23
  -2  15   1    2.48    0.44
  -2  15   2    9.21    0.18
   0  16   0    6.48    0.21
  -8   0   5   -0.36    1.16
  -8   0   4    5.01    0.24
  -8   0   3   -2.94    0.69
  -7   0   6    1.29    1.27
  -6   0   8   -2.52    0.84
  -5   0   9    0.93    1.46
  -3   0  10    1.19    1.30
  -2   0  10    5.37    0.24
  -1   0  11    2.41    0.45
   0   0  11   -0.54    1.84
   2   0  10    2.42    0.45
   3   0  10    3.28    0.36
   4   0   9    1.63    0.59
   5   0   9   -2.76    0.86
   6   0   8    3.56    0.33
   7   0   6   10.53    0.17
   8   0   4    4.33    0.28
   8   0   3    1.37    0.60
   8   1   3    9.06    0.17
   8   1   4    3.53    0.32
   7   1   6   22.16    0.30
   6   1   8   11.44    0.17
   5   1   9    1.33    1.42
   4   1   9   12.92    0.18
   3   1  10    3.32    0.38
   2   1  10    4.30    0.30
   0   1  11    7.84    0.21
  -2   1  10    3.21    0.38
  -3   1  10    2.72    0.43
  -5   1   9    2.14    0.50
  -6   1   8    6.41    0.22
  -7   1   6   -1.58    1.08
  -8   1   3    3.43    0.31
  -8   1   4    8.47    0.18
  -8   1   5    3.25    0.35
  -8   2   4   -1.41    1.27
  -8   2   3    7.69    0.19
  -7   2   6    6.88    0.19
  -6   2   8    6.14    0.21
  -5   2   9    4.71    0.27
  -4   2   9   13.07    0.19
  -3   2  10    1.31    1.39
  -2   2  10    8.06    0.19
   2   2  10    3.68    0.32
   3   2  10    1.42    1.26
   4   2   9    5.66    0.24
   5   2   9    7.10    0.21
   6   2   8    3.28    0.38
   6   2   7    3.66    0.31
   7   2   6   10.12    0.17
   8   2   4    3.29    0.32
   8   2   3    6.93    0.20
   8   3   3    1.69    0.57
   8   3   4    4.23    0.29
   7   3   6    4.24    0.29
   6   3   7    0.91    1.53
   5   3   8    2.87    0.37
   4   3   9    4.33    0.28
   3   3  10    3.88    0.32
   2   3  10    1.29    1.39
  -2   3  10    3.64    0.31
  -3   3  10   -0.70    0.98
  -4   3   9    3.14    0.35
  -5   3   9    7.44    0.20
  -6   3   7    4.59    0.25
  -6   3   8    2.17    0.50
  -7   3   6    2.48    0.40
  -8   3   3   10.92    0.16
  -8   3   4   11.53    0.18
  -8   4   4    4.38    0.29
  -8   4   3    9.79    0.17
  -8   4   2    2.89    0.35
  -7   4   6    1.67    0.60
  -6   4   7    1.27    0.70
  -5   4   8   11.93    0.19
  -4   4   9    3.71    0.31
  -3   4  10    5.04    0.26
  -2   4  10   -1.40    1.25
  -1   4  10   15.27    0.25
   0   4  10    2.83    0.42
   1   4  10   -1.28    1.32
   2   4  10    3.55    0.36
   3   4  10    4.10    0.31
   4   4   9   -2.95    0.74
   5   4   8    5.32    0.25
   6   4   7   -2.47    0.86
   7   4   5    5.77    0.22
   7   4   6    3.79    0.31
   8   4   4    6.32    0.22
   8   4   3    4.89    0.25
   8   4   2   -2.09    0.92
   8   5   0    7.32    0.18
   8   5   1    1.03    0.74
   8   5   2    7.47    0.19
   8   5   3    4.06    0.29
   7   5   6    2.93    0.40
   7   5   5    6.69    0.22
   6   5   7   13.53    0.20
   5   5   8    2.07    0.51
   4   5   9    3.78    0.32
   2   5  10    8.58    0.19
   1   5  10    8.79    0.19
   0   5  10   19.86    0.27
  -1   5  10    5.20    0.26
  -2   5  10    1.79    0.61
  -4   5   9   17.07    0.25
  -5   5   8    4.19    0.30
  -6   5   7   11.42    0.17
  -7   5   6    1.79    0.53
  -7   5   5   -0.97    0.83
  -8   5   0    7.04    0.18
  -8   5   1    1.80    0.54
  -8   5   2    6.98    0.19
  -8   5   3    4.21    0.28
  -8   6   3    7.51    0.20
  -8   6   2    9.05    0.18
  -8   6   1   11.13    0.17
  -8   6   0   10.01    0.16
  -7   6   5    4.60    0.26
  -6   6   7    6.09    0.24
  -5   6   8    4.24    0.29
  -4   6   9    6.61    0.24
  -3   6   9    9.00    0.18
  -2   6  10    6.25    0.24
  -1   6  10    1.61    1.29
   0   6  10   19.82    0.27
   1   6  10    1.86    0.59
   2   6  10   -0.54    1.86
   3   6   9    8.54    0.19
   4   6   9    5.14    0.26
   5   6   8    8.22    0.20
   6   6   7   11.54    0.17
   6   6   6    8.53    0.18
   7   6   4    9.77    0.16
   7   6   5    5.66    0.23
   8   6   3    6.99    0.20
   8   6   2    4.75    0.26
   8   6   1    3.79    0.30
   8   6   0    9.47    0.17
   8   7   0    2.54    0.42
   8   7   1   11.14    0.17
   8   7   2    1.09    1.44
   7   7   5    6.89    0.21
   7   7   4    7.33    0.19
   6   7   6    6.23    0.22
   5   7   7   12.06    0.18
   4   7   8    2.78    0.40
   3   7   9    4.60    0.29
   2   7   9    7.44    0.20
   1   7  10    5.95    0.25
   0   7  10    8.73    0.20
  -1   7  10    5.16    0.27
  -2   7   9    1.08    0.79
  -3   7   9   10.74    0.17
  -4   7   8   -1.65    1.23
  -5   7   8    8.27    0.19
  -5   7   7   13.63    0.20
  -6   7   6    0.35    1.22
  -7   7   5    2.12    0.50
  -7   7   4    8.57    0.18
  -8   7   0    2.71    0.41
  -8   7   1    7.19    0.21
  -8   7   2    3.89    0.31
  -7   8   3   20.28    0.26
  -7   8   4    6.60    0.20
  -6   8   6    4.58    0.27
  -5   8   7    4.20    0.31
  -4   8   8   15.00    0.23
  -3   8   9    1.44    1.35
  -2   8   9    5.06    0.26
  -1   8   9    5.30    0.25
   0   8   9    7.76    0.20
   1   8   9    3.67    0.34
   2   8   9    4.81    0.28
   3   8   9    9.93    0.18
   4   8   8   12.42    0.18
   5   8   7    8.92    0.19
   6   8   6   11.30    0.17
   6   8   5    8.59    0.19
   7   8   3    6.57    0.21
   7   8   4   10.47    0.17
   7   9   3    5.14    0.23
   7   9   2    0.65    0.93
   7   9   1    2.25    0.41
   7   9   0    5.06    0.23
   6   9   5    6.91    0.21
   5   9   7    6.49    0.21
   5   9   6    6.50    0.21
   4   9   7   10.33    0.17
   4   9   8    4.93    0.28
   3   9   8    8.91    0.18
   2   9   9   12.64    0.20
   1   9   9   -0.76    1.64
   0   9   9    3.66    0.35
  -1   9   9   14.21    0.20
  -2   9   9    4.29    0.29
  -3   9   8    8.83    0.18
  -4   9   7    6.81    0.20
  -4   9   8    6.84    0.22
  -5   9   7    8.16    0.20
  -5   9   6   12.32    0.19
  -6   9   5   14.35    0.22
  -7   9   3    3.68    0.33
  -7   9   2    5.61    0.23
  -7   9   1    5.87    0.22
  -7   9   0    4.76    0.25
  -7  10   0   -1.31    1.17
  -7  10   1    3.78    0.29
  -7  10   2   15.10    0.21
  -6  10   5    3.75    0.30
  -6  10   4   14.41    0.23
  -5  10   6    9.70    0.17
  -4  10   7   -0.35    1.18
  -3  10   8    2.49    0.48
  -2  10   8   10.38    0.17
  -1  10   8   10.81    0.17
   0  10   9    8.80    0.20
   1  10   8    9.99    0.18
   2  10   8    4.67    0.28
   3  10   8   -1.43    1.29
   4  10   7    3.40    0.36
   5  10   6    5.83    0.24
   6  10   5    6.36    0.22
   6  10   4    4.68    0.26
   7  10   0   -2.00    0.94
   7  10   1    1.20    1.31
   7  10   2    2.19    0.45
   6  11   2    5.38    0.23
   6  11   3    3.71    0.31
   6  11   4    5.01    0.25
   5  11   5    3.70    0.37
   4  11   6    1.29    1.24
   3  11   7   -1.19    1.39
   2  11   8    8.37    0.19
   1  11   8   -0.76    1.66
   0  11   8   11.53    0.17
  -1  11   8    0.53    1.83
  -2  11   8   -2.23    0.96
  -3  11   7    5.07    0.26
  -4  11   6    4.37    0.28
  -4  11   7    3.85    0.31
  -5  11   5   -2.43    0.90
  -6  11   2   12.74    0.20
  -6  11   3   13.07    0.18
  -6  11   4    3.09    0.38
  -6  12   3   -2.83    0.79
  -6  12   2    5.95    0.24
  -6  12   1   13.50    0.21
  -6  12   0    1.44    0.63
  -5  12   3   10.36    0.16
  -5  12   4    4.08    0.30
  -5  12   5    1.67    0.60
  -4  12   6    7.53    0.19
  -4  12   5    0.74    1.56
  -3  12   6    1.72    0.61
  -3  12   7    6.13    0.23
  -2  12   7   10.77    0.17
  -1  12   7   -1.96    1.07
   0  12   7    2.14    0.49
   1  12   7    2.10    0.49
   2  12   7    5.29    0.26
   3  12   6   10.34    0.17
   3  12   7    6.05    0.23
   4  12   6    6.06    0.23
   4  12   5    6.82    0.20
   5  12   3   11.27    0.18
   5  12   4    7.11    0.20
   5  12   5    4.45    0.31
   6  12   2    6.03    0.23
   6  12   1    8.96    0.18
   6  12   0   -0.70    0.96
   5  13   3   16.55    0.24
   5  13   2    2.64    0.37
   5  13   1    7.63    0.18
   5  13   0    0.94    0.77
   4  13   4   10.04    0.17
   4  13   5    3.19    0.35
   3  13   6   -2.29    0.93
   3  13   5   11.88    0.19
   2  13   6    6.97    0.21
   1  13   7    9.95    0.18
   1  13   6    2.86    0.39
   0  13   7    2.22    0.48
  -1  13   7    4.59    0.27
  -1  13   6   10.44    0.16
  -2  13   6   12.82    0.20
  -3  13   6    5.49    0.24
  -3  13   5    7.90    0.18
  -4  13   4    3.88    0.28
  -4  13   5    0.83    0.93
  -5  13   3   -2.45    0.89
  -5  13   2   -2.24    0.90
  -5  13   1    2.26    0.43
  -5  13   0    2.76    0.33
  -5  14   0   -0.54    1.75
  -5  14   1    2.52    0.41
  -5  14   2   10.15    0.18
  -4  14   4   -1.95    1.01
  -4  14   3    7.36    0.20
  -4  14   2   14.62    0.22
  -3  14   4   11.60    0.17
  -3  14   5    2.27    0.47
  -2  14   6    7.19    0.21
  -2  14   5   14.29    0.20
  -1  14   5    7.54    0.19
  -1  14   6    9.40    0.18
   0  14   6    2.26    0.48
   1  14   5   12.90    0.18
   1  14   6    9.99    0.17
   2  14   5    7.72    0.18
   3  14   4    8.12    0.18
   3  14   5   -0.94    1.45
   4  14   4    6.80    0.21
   4  14   3    7.29    0.19
   4  14   2   14.43    0.22
   4  14   1   15.72    0.24
   5  14   0    2.12    0.46
   5  14   1    2.31    0.43
   4  15   0   16.88    0.24
   4  15   1    2.09    0.48
   4  15   2   12.65    0.20
   3  15   4    5.31    0.26
   3  15   3    8.73    0.18
   3  15   2    7.84    0.18
   3  15   1   -2.81    0.75
   3  15   0    0.74    1.56
   2  15   3    9.09    0.17
   2  15   4   16.58    0.24
   1  15   5    3.16    0.35
   1  15   4   13.25    0.20
   0  15   4    2.95    0.36
   0  15   5    1.86    0.56
  -1  15   5    4.63    0.27
  -1  15   4   11.73    0.17
  -2  15   3    4.25    0.28
  -2  15   4   13.80    0.22
  -3  15   4   -2.04    1.06
  -3  15   3    4.69    0.28
  -3  15   2   27.90    0.29
  -3  15   1   -2.50    0.86
  -3  15   0   -1.56    1.24
  -4  15   0   17.37    0.27
  -4  15   1    1.08    1.46
  -4  15   2   -1.08    1.37
  -3  16   0    4.19    0.27
  -3  16   1    2.50    0.42
  -3  16   2    3.22    0.35
  -2  16   3    4.25    0.28
  -2  16   2    6.27    0.21
  -2  16   1   15.60    0.22
  -2  16   0    6.98    0.20
  -1  16   0    4.04    0.29
  -1  16   1   15.86    0.24
  -1  16   2    0.75    1.64
  -1  16   3    9.02    0.18
  -1  16   4    7.26    0.20
   0  16   4    2.68    0.42
   0  16   3    3.56    0.31
   0  16   2    2.66    0.41
   0  16   1   10.09    0.17
   1  16   0    4.45    0.25
   1  16   1   13.53    0.20
   1  16   2    3.21    0.34
   1  16   3    5.48    0.23
   2  16   3   11.58    0.17
   2  16   2   -0.75    1.45
   2  16   1   12.80    0.18
   2  16   0    7.09    0.20
   3  16   0    4.23    0.28
   3  16   1    7.60    0.19
   1  17   1    8.64    0.18
   1  17   0    0.71    0.92
   0  17   0   -1.32    1.25
   0  17   1    1.83    0.52
   0  17   2    2.55    0.42
  -1  17   1    3.52    0.33
  -1  17   0    0.94    1.41
  -9   0   0    1.34    1.20
  -9   0   1    0.78    1.56
  -9   0   2    4.33    0.28
  -9   0   3    1.37    1.22
  -8   0   6    3.21    0.35
  -7   0   7    2.09    0.47
  -7   0   8   10.98    0.17
  -6   0   9   -2.87    0.80
  -5   0  10    1.97    0.58
  -4   0  10    6.44    0.21
  -3   0  11    1.17    0.82
  -2   0  11   -2.14    0.99
   1   0  11    0.95    1.50
   2   0  11    1.36    0.70
   3   0  11    1.87    0.56
   4   0  10   11.95    0.17
   6   0   9   -3.80    0.71
   7   0   7   -1.34    1.32
   8   0   6    0.80    1.53
   8   0   5    1.45    1.19
   9   0   0    0.00    2.08
   9   0   1   -0.55    1.68
   9   0   2    5.21    0.24
   9   0   3   -2.17    0.95
   9   1   3   -2.75    0.81
   9   1   2    0.78    1.50
   9   1   1    0.00    2.19
   9   1   0   -1.55    1.09
   8   1   5    3.12    0.38
   8   1   6    0.74    1.00
   7   1   7    1.23    1.34
   6   1   9    7.09    0.22
   4   1  10    2.83    0.41
   3   1  11    4.99    0.27
   2   1  11    9.85    0.18
   1   1  11    8.01    0.20
  -1   1  11   10.97    0.17
  -2   1  11    2.14    0.52
  -3   1  11    0.80    1.66
  -4   1  10    1.23    1.40
  -5   1  10    0.53    1.12
  -6   1   9    5.48    0.25
  -7   1   8    1.51    1.20
  -7   1   7    0.77    1.53
  -8   1   6    5.22    0.24
  -9   1   3    0.94    0.86
  -9   1   2    3.20    0.36
  -9   1   1    4.65    0.28
  -9   1   0   -1.48    0.60
  -9   2   0    1.46    1.08
  -9   2   1    8.37    0.19
  -9   2   2    4.89    0.27
  -9   2   3    5.51    0.24
  -8   2   6    4.37    0.28
  -8   2   5    5.31    0.25
  -7   2   7    1.10    1.42
  -6   2   9    8.59    0.20
  -4   2  10   -3.01    0.82
  -3   2  11    2.65    0.44
  -2   2  11   -1.92    1.16
  -1   2  11   -0.55    1.89
   0   2  11    5.93    0.25
   1   2  11   13.50    0.19
   2   2  11    2.58    0.44
   3   2  11   -3.49    0.75
   4   2  10   14.63    0.22
   6   2   9    5.84    0.24
   7   2   7    7.45    0.21
   8   2   6    7.57    0.21
   8   2   5    1.76    0.54
   9   2   0   -0.57    1.02
   9   2   1   10.19    0.17
   9   2   2   -2.42    0.90
   9   2   3    5.13    0.25
   9   3   3    1.50    1.10
   9   3   2    1.37    1.25
   9   3   1    0.00    2.35
   9   3   0    3.76    0.30
   8   3   5    5.13    0.26
   8   3   6    6.44    0.23
   7   3   7   12.53    0.18
   6   3   8   -0.57    1.08
   5   3   9    8.37    0.19
   4   3  10    4.95    0.28
   2   3  11    0.00    2.29
   1   3  11    3.17    0.38
   0   3  11    6.57    0.23
  -1   3  11    4.56    0.31
  -2   3  11    0.97    1.54
  -3   3  11    4.77    0.30
  -4   3  10    5.46    0.26
  -7   3   7    1.56    0.61
  -8   3   5   10.10    0.18
  -8   3   6    3.56    0.34
  -9   3   3   14.21    0.22
  -9   3   2    5.62    0.23
  -9   3   1    4.24    0.28
  -9   3   0    3.63    0.32
  -9   4   0    6.62    0.22
  -9   4   1    3.56    0.33
  -9   4   2   -2.57    0.91
  -9   4   3    2.96    0.35
  -8   4   5    1.24    1.39
  -7   4   7    5.77    0.23
  -6   4   8    3.71    0.32
  -5   4   9    0.00    2.19
  -4   4  10    5.08    0.26
  -2   4  11    0.45    1.21
  -1   4  11    3.64    0.36
   0   4  11    5.22    0.26
   1   4  11    4.03    0.33
   2   4  11    6.23    0.24
   4   4  10    7.37    0.22
   5   4   9    5.09    0.28
   6   4   8    1.10    1.38
   7   4   7    3.94    0.33
   8   4   5    2.19    0.50
   9   4   0    7.03    0.20
   9   4   1    2.20    0.46
   9   4   2    4.10    0.29
   9   5   2    2.78    0.39
   9   5   1   -1.49    1.23
   9   5   0    5.07    0.25
   8   5   4    1.65    0.58
   8   5   5    6.64    0.22
   7   5   7    4.55    0.30
   6   5   8    5.83    0.25
   5   5   9    4.47    0.29
   4   5  10    5.26    0.28
   3   5  10    9.15    0.19
   2   5  11   13.25    0.20
   1   5  11    5.37    0.29
   0   5  11    5.72    0.28
  -1   5  11    6.22    0.24
  -2   5  11    3.97    0.33
  -3   5  10    9.17    0.19
  -4   5  10    3.95    0.34
  -5   5   9    4.07    0.31
  -6   5   8    3.20    0.36
  -7   5   7   -1.77    1.08
  -8   5   4    5.68    0.23
  -8   5   5   -2.31    0.95
  -9   5   2    7.55    0.21
  -9   5   1    0.00    2.19
  -9   5   0    4.76    0.27
  -9   6   0    5.50    0.24
  -8   6   5    1.93    0.52
  -8   6   4   -1.46    1.16
  -7   6   6    1.65    0.59
  -7   6   7   -1.97    1.02
  -6   6   8   -2.57    0.91
  -5   6   9    7.28    0.22
  -3   6  10   12.04    0.17
  -1   6  11    7.70    0.21
   0   6  11   -2.77    0.93
   1   6  11    2.90    0.41
   3   6  10    7.72    0.22
   5   6   9    2.72    0.42
   6   6   8    1.52    0.64
   7   6   6    3.68    0.35
   8   6   5    3.61    0.34
   8   6   4    2.01    0.50
   9   6   0    5.69    0.24
   8   7   3    5.11    0.25
   8   7   4    1.94    0.52
   7   7   6    5.08    0.27
   6   7   7    2.76    0.40
   5   7   8   -2.38    1.01
   4   7   9    4.77    0.28
   3   7  10    2.14    0.53
   2   7  10    3.43    0.38
  -2   7  10    0.92    0.91
  -3   7  10   -1.26    1.43
  -4   7   9    4.71    0.28
  -5   7   9    3.33    0.38
  -6   7   7    3.34    0.37
  -6   7   8   -1.27    1.42
  -7   7   6    7.61    0.20
  -8   7   3    1.35    1.15
  -8   7   4   -0.79    1.61
  -8   8   3   -1.58    1.14
  -8   8   2    9.96    0.17
  -8   8   1   20.80    0.27
  -8   8   0    4.06    0.28
  -7   8   5    1.82    0.59
  -7   8   6    1.39    1.33
  -6   8   7    6.05    0.23
  -5   8   8   -0.78    1.66
  -4   8   9    4.17    0.32
  -2   8  10    5.07    0.28
  -1   8  10    6.99    0.22
   0   8  10    9.68    0.19
   1   8  10    1.83    0.63
   2   8  10    3.52    0.38
   4   8   9    1.42    0.70
   5   8   8    4.17    0.32
   6   8   7    7.57    0.21
   7   8   5    5.96    0.24
   7   8   6    1.94    0.57
   8   8   3    4.66    0.26
   8   8   2   -1.56    1.23
   8   8   1    2.43    0.41
   8   8   0    3.78    0.30
   8   9   0    5.26    0.24
   8   9   1    1.48    1.14
   8   9   2    2.72    0.41
   7   9   5    2.91    0.41
   7   9   4   -2.57    0.88
   6   9   6    3.79    0.34
   6   9   7    4.53    0.29
   5   9   8    1.27    1.39
   3   9   9   -0.55    1.92
   1   9  10   10.23    0.19
   0   9  10   10.74    0.18
  -1   9  10    7.70    0.21
  -3   9   9   -1.35    1.31
  -4   9   9   13.69    0.20
  -5   9   8    6.28    0.23
  -6   9   6   -1.89    1.08
  -6   9   7   -2.47    0.96
  -7   9   5    7.40    0.21
  -7   9   4    3.00    0.38
  -8   9   0    4.89    0.26
  -8   9   1    3.60    0.33
  -8   9   2    3.99    0.30
  -8  10   0    1.88    0.53
  -7  10   3    5.55    0.24
  -7  10   4   11.48    0.17
  -6  10   6   12.13    0.18
  -5  10   7    1.24    1.37
  -4  10   8   -2.54    0.87
  -3  10   9    5.99    0.25
  -2  10   9   -1.83    1.12
  -1  10   9   -2.12    1.03
   1  10   9    6.05    0.25
   2  10   9    9.79    0.18
   3  10   9    9.02    0.20
   4  10   8   -1.47    1.29
   5  10   7   -1.36    1.35
   6  10   6    2.06    0.51
   7  10   3    0.95    0.83
   7  10   4    5.50    0.24
   8  10   0    2.35    0.44
   7  11   3    0.56    1.81
   7  11   2    2.63    0.39
   7  11   1   -1.02    0.78
   7  11   0    3.99    0.29
   6  11   5    7.14    0.22
   5  11   7    4.92    0.28
   5  11   6   -2.57    0.87
   4  11   7   11.71    0.17
   3  11   8    2.62    0.42
   2  11   9    7.25    0.22
   1  11   9    4.47    0.31
   0  11   9   -2.30    1.00
  -1  11   9    4.09    0.31
  -2  11   9   -1.39    1.30
  -3  11   8    4.91    0.27
  -4  11   8    2.76    0.44
  -5  11   7    5.32    0.26
  -5  11   6    7.28    0.21
  -6  11   5    5.16    0.26
  -7  11   3    5.79    0.24
  -7  11   2    8.89    0.19
  -7  11   1    3.09    0.38
  -7  11   0    3.70    0.32
  -7  12   0    2.71    0.39
  -7  12   1   -0.56    1.72
  -7  12   2   -1.39    1.29
  -6  12   5    9.77    0.19
  -6  12   4   -2.66    0.85
  -5  12   6    4.50    0.28
  -4  12   7    2.36    0.47
  -3  12   8    8.92    0.19
  -2  12   8   -2.00    1.08
  -1  12   8   -1.39    0.72
   0  12   8    0.00    2.35
   1  12   8    7.78    0.20
   2  12   8   -1.63    0.66
   3  12   8    3.50    0.35
   4  12   7    3.90    0.33
   5  12   6    4.16    0.32
   6  12   4    3.32    0.37
   6  12   3    3.83    0.31
   7  12   0    2.66    0.40
   7  12   1    5.52    0.24
   7  12   2    3.76    0.33
   6  13   0    6.95    0.21
   6  13   1    3.63    0.32
   6  13   2    1.36    1.23
   6  13   3   11.73    0.17
   5  13   5    1.38    1.18
   5  13   4    4.55    0.28
   4  13   6    5.38    0.27
   3  13   7    1.12    1.52
   2  13   7   -2.33    0.98
   1  13   8    7.74    0.21
   0  13   8    7.89    0.20
  -1  13   8    7.14    0.22
  -2  13   7    4.67    0.28
  -3  13   7    1.48    1.19
  -4  13   6    3.88    0.33
  -5  13   5    6.15    0.23
  -5  13   4    2.50    0.42
  -6  13   0    7.01    0.20
  -6  13   1    8.02    0.20
  -6  13   2    0.00    2.28
  -6  13   3   -3.17    0.76
  -6  14   1    4.63    0.29
  -6  14   0   10.47    0.18
  -5  14   3    2.89    0.39
  -5  14   4    6.04    0.23
  -4  14   5    2.64    0.44
  -3  14   6    7.41    0.20
  -2  14   7    3.73    0.34
  -1  14   7    0.45    1.18
   0  14   7    3.14    0.40
   1  14   7   -1.48    1.30
   2  14   7    2.21    0.50
   2  14   6    6.88    0.23
   3  14   6    1.48    1.24
   4  14   5    0.97    1.52
   5  14   2    4.35    0.28
   5  14   3    3.93    0.32
   5  14   4   12.41    0.20
   6  14   1   -1.70    1.09
   6  14   0   10.73    0.17
   5  15   2    4.04    0.32
   5  15   1    0.82    0.90
   5  15   0    1.95    0.53
   4  15   3    8.16    0.19
   4  15   4    4.98    0.27
   3  15   5    3.23    0.38
   2  15   5    1.73    1.28
   2  15   6    5.73    0.26
   1  15   6    1.32    0.74
   0  15   6   -1.36    1.32
  -1  15   6    9.27    0.19
  -2  15   5    2.52    0.45
  -2  15   6    1.38    1.28
  -3  15   5    4.90    0.29
  -4  15   3    5.23    0.24
  -4  15   4    1.27    0.73
  -5  15   2    1.26    1.35
  -5  15   1    6.31    0.22
  -5  15   0    2.72    0.41
  -4  16   3    9.31    0.19
  -4  16   2    4.48    0.28
  -4  16   1    5.80    0.23
  -4  16   0   -2.61    0.82
  -3  16   3    4.28    0.29
  -3  16   4   -1.59    1.19
  -2  16   5    6.37    0.24
  -2  16   4    0.96    1.52
  -1  16   5    7.60    0.20
   0  16   5    2.00    0.54
   1  16   4   -0.94    1.51
   1  16   5    3.02    0.40
   2  16   5    7.07    0.22
   2  16   4    7.63    0.20
   3  16   2    4.14    0.28
   3  16   3   11.45    0.18
   3  16   4    0.80    1.68
   4  16   2    5.75    0.24
   4  16   1    3.05    0.34
   4  16   0    0.00    2.21
   3  17   2   12.00    0.19
   3  17   1    2.08    0.50
   3  17   0    5.99    0.24
   2  17   0    2.39    0.45
   2  17   1   -2.40    0.84
   2  17   2    4.36    0.28
   2  17   3    4.94    0.27
   1  17   4   -1.13    1.41
   1  17   3    3.11    0.39
   1  17   2    3.71    0.32
   0  17   3   -1.24    1.36
   0  17   4    0.98    1.47
  -1  17   4   -1.38    1.39
  -1  17   3    3.33    0.34
  -1  17   2    0.95    1.37
  -2  17   0    0.00    2.17
  -2  17   1   10.10    0.17
  -2  17   2    1.47    1.19
  -2  17   3    2.81    0.40
  -3  17   2    0.98    1.42
  -3  17   1   -2.17    1.02
  -3  17   0    6.22    0.22
  -1  18   0   -1.38    1.25
  -1  18   1    3.75    0.30
  -1  18   2    1.27    1.29
   0  18   2   -2.19    0.92
   0  18   1   -2.45    0.87
   0  18   0    4.78    0.26
   1  18   0   -2.18    0.89
   1  18   1    1.78    0.57
 -10   0   1    0.70    1.05
 -10   0   0    7.41    0.23
  -9   0   4    6.61    0.23
  -9   0   5   -0.82    1.67
  -8   0   7    1.80    0.57
  -4   0  11   -2.77    0.88
  -2   0  12   -2.80    0.91
  -1   0  12    1.78    0.61
   0   0  12    1.69    0.62
   1   0  12    1.86    0.60
   2   0  12    5.57    0.30
   4   0  11   -2.09    1.06
   5   0  10    7.98    0.22
   7   0   8    9.49    0.19
   8   0   7    1.48    0.72
   9   0   4    4.80    0.27
   9   0   5   -2.92    0.79
  10   0   1    1.61    0.64
  10   0   0    7.57    0.22
  10   1   0    3.76    0.37
   9   1   5    4.06    0.31
   9   1   4    0.00    2.34
   8   1   7    7.22    0.23
   7   1   8    1.40    1.43
   5   1  10    4.72    0.30
   4   1  11   -2.17    1.17
   2   1  12    2.38    0.56
   1   1  12    0.93    0.95
   0   1  12    4.07    0.35
  -1   1  12    5.73    0.27
  -2   1  12    4.72    0.31
  -4   1  11    6.04    0.25
  -8   1   7    5.99    0.25
  -9   1   5    6.38    0.24
  -9   1   4    2.54    0.43
 -10   1   0    4.74    0.28
 -10   1   1    5.39    0.27
  -9   2   4    1.72    1.28
  -9   2   5    7.97    0.22
  -8   2   7    2.22    0.54
  -7   2   8    0.81    1.60
  -5   2  10    1.65    0.65
  -4   2  11   -1.00    1.50
  -2   2  12    4.45    0.33
  -1   2  12    7.50    0.23
   0   2  12    8.72    0.21
   1   2  12   -1.19    0.87
   2   2  12    4.37    0.34
   4   2  11    4.75    0.32
   5   2  10   -1.72    1.23
   7   2   8    3.63    0.34
   8   2   7    5.75    0.26
   9   2   4    1.90    0.52
   9   2   5   -3.21    0.79
   9   3   5    2.85    0.45
   9   3   4   -1.00    1.43
   8   3   7    2.68    0.46
   7   3   8    7.61    0.21
   6   3   9    1.15    1.53
   5   3  10    6.73    0.23
   4   3  11    0.00    2.54
   3   3  11    3.32    0.41
   1   3  12    4.27    0.34
   0   3  12    2.54    0.50
  -1   3  12   -1.65    1.26
  -4   3  11   -1.30    1.56
  -5   3  10   -1.63    0.64
  -6   3   9    2.77    0.43
  -7   3   8    4.15    0.33
  -8   3   7    1.66    0.68
  -9   3   5    3.11    0.42
  -9   3   4    5.99    0.24
  -9   4   4    9.31    0.19
  -8   4   7    2.82    0.46
  -8   4   6    5.19    0.27
  -7   4   8   -1.03    0.84
  -6   4   9    5.46    0.26
  -5   4  10    1.00    1.67
  -4   4  11    1.18    1.50
  -3   4  11    5.40    0.27
  -1   4  12   -1.02    1.66
   0   4  12    5.53    0.29
   1   4  12    8.40    0.22
   3   4  11    7.87    0.21
   4   4  11    5.28    0.30
   5   4  10    2.46    0.48
   6   4   9    0.82    1.70
   7   4   8    2.80    0.40
   8   4   6    7.48    0.21
   9   4   3    1.40    1.19
   9   4   4   -0.58    1.83
   9   5   4    1.54    0.66
   9   5   3    2.17    0.47
   8   5   6    1.34    0.73
   7   5   8    2.83    0.46
   6   5   9   -2.40    1.00
   5   5  10    4.32    0.32
   3   5  11    6.14    0.25
  -3   5  11    7.19    0.22
  -5   5  10    3.84    0.37
  -6   5   9    1.42    1.36
  -7   5   8   -3.24    0.80
  -8   5   6    0.00    2.33
  -9   5   4    2.08    0.54
  -9   5   3   -0.57    1.81
  -9   6   1    1.29    0.71
  -9   6   2   -1.72    1.11
  -9   6   3    2.88    0.42
  -9   6   4    3.81    0.37
  -8   6   6    0.82    1.66
  -7   6   8   -1.66    1.38
  -6   6   9    1.31    1.50
  -5   6  10    5.69    0.29
  -4   6  10    1.96    0.58
  -3   6  11    4.28    0.36
  -2   6  11    0.81    1.71
   2   6  11    0.00    2.45
   3   6  11    1.97    0.60
   4   6  10   -0.53    1.15
   6   6   9    4.24    0.35
   7   6   7    4.58    0.31
   8   6   6    4.44    0.33
   9   6   1    5.28    0.26
   9   6   2   -2.07    0.92
   9   6   3    1.01    1.52
   9   7   3    3.70    0.35
   9   7   2    4.51    0.29
   9   7   1    7.60    0.21
   9   7   0   -1.82    0.94
   8   7   5    2.03    0.50
   7   7   7    1.16    1.48
   6   7   8   -1.14    1.41
   5   7   9   -2.14    1.12
   4   7  10    2.48    0.47
   2   7  11    4.76    0.32
   1   7  11    6.98    0.24
   0   7  11    4.52    0.31
  -1   7  11    1.87    0.60
  -2   7  11    1.43    1.43
  -4   7  10    1.07    0.86
  -7   7   7    3.36    0.34
  -8   7   5    4.20    0.31
  -8   7   6   -2.76    0.91
  -9   7   3    3.09    0.41
  -9   7   2    1.86    0.58
  -9   7   1   -2.23    0.94
  -9   7   0    0.58    1.68
  -9   8   0    0.00    2.34
  -9   8   1   -1.59    0.66
  -9   8   2    5.19    0.28
  -8   8   5    2.86    0.43
  -8   8   4    3.31    0.38
  -7   8   7    2.20    0.53
  -6   8   8    5.01    0.27
  -5   8   9    1.53    1.37
  -4   8  10    2.34    0.57
  -3   8  10   11.50    0.18
  -2   8  11    1.56    1.33
  -1   8  11    2.77    0.51
   0   8  11    2.84    0.46
   1   8  11   10.42    0.20
   3   8  10    6.93    0.23
   4   8  10    2.95    0.48
   5   8   9    1.42    1.42
   6   8   8   -1.11    0.86
   7   8   7    5.23    0.30
   8   8   5    5.03    0.30
   8   8   4    0.00    2.25
   9   8   0    2.13    0.54
   9   8   1    5.57    0.28
   8   9   3    2.34    0.44
   8   9   4    3.83    0.36
   7   9   6    5.79    0.25
   6   9   8    9.91    0.20
   5   9   9    1.45    1.42
   4   9   9   -1.80    1.24
   3   9  10    3.95    0.37
   2   9  10    3.96    0.34
  -2   9  10    4.09    0.31
  -3   9  10    3.57    0.41
  -5   9   9    6.14    0.26
  -6   9   8    2.15    0.54
  -7   9   6    1.62    0.61
  -8   9   3    3.12    0.38
  -8   9   4    2.48    0.45
  -8  10   3   -2.46    0.92
  -8  10   2    1.36    0.67
  -8  10   1    1.24    0.72
  -7  10   5    3.30    0.36
  -7  10   6    2.43    0.50
  -6  10   7    2.68    0.44
  -5  10   8    3.72    0.34
  -4  10   9   -2.01    1.17
  -2  10  10    1.54    1.38
  -1  10  10    1.31    0.79
   0  10  10   13.34    0.20
   1  10  10    4.08    0.34
   2  10  10    2.39    0.55
   4  10   9    4.98    0.32
   5  10   8   -0.82    1.63
   6  10   7    4.82    0.28
   7  10   5    2.88    0.42
   7  10   6    0.00    2.44
   8  10   3    4.66    0.31
   8  10   2    2.67    0.43
   8  10   1   -1.49    0.63
   8  11   0    3.64    0.35
   8  11   1    1.17    1.44
   8  11   2    0.59    1.75
   7  11   5   -1.17    1.44
   7  11   4   -0.65    1.04
   6  11   6   -1.62    1.27
   5  11   8    1.77    1.33
   4  11   8    1.51    1.35
   3  11   9    0.00    2.41
   1  11  10    4.75    0.34
   0  11  10    3.21    0.43
  -1  11  10    3.63    0.37
  -3  11   9    4.45    0.31
  -5  11   8    3.74    0.38
  -6  11   6    1.70    0.60
  -6  11   7    2.27    0.57
  -7  11   5    0.89    0.94
  -7  11   4    6.14    0.24
  -8  11   0    3.76    0.35
  -8  11   1    3.56    0.35
  -8  11   2    5.86    0.27
  -7  12   3    7.98    0.21
  -7  12   4    1.84    0.62
  -6  12   6   -1.75    1.14
  -5  12   7    6.18    0.24
  -4  12   8    3.09    0.43
  -3  12   9    4.95    0.32
  -2  12   9    1.37    0.75
  -1  12   9    1.00    1.57
   0  12   9    4.69    0.31
   1  12   9    1.52    1.29
   2  12   9    2.25    0.55
   4  12   8    2.02    0.63
   5  12   7    1.70    0.66
   6  12   6   -0.83    1.68
   6  12   5    2.65    0.42
   7  12   3   -2.64    0.87
   7  12   4    5.29    0.26
   7  13   3    2.72    0.44
   7  13   2    3.65    0.36
   7  13   1    1.53    1.33
   7  13   0    4.43    0.29
   6  13   4    0.99    1.44
   6  13   5    4.73    0.30
   5  13   6    7.00    0.23
   4  13   7    2.90    0.42
   3  13   8    1.82    0.65
   2  13   8    5.94    0.25
   1  13   9    3.79    0.37
   0  13   9    1.23    0.87
  -1  13   9    4.59    0.33
  -2  13   8   -2.13    1.02
  -3  13   8    1.54    1.27
  -4  13   7    1.52    1.23
  -5  13   6    4.24    0.31
  -6  13   4    6.61    0.23
  -6  13   5   -2.61    0.95
  -7  13   3    5.65    0.27
  -7  13   2   -1.42    1.27
  -7  13   1    2.13    0.51
  -7  13   0    4.31    0.29
  -6  14   4    6.46    0.25
  -6  14   3    6.46    0.24
  -6  14   2    9.50    0.19
  -5  14   5   10.27    0.19
  -4  14   7   11.71    0.19
  -4  14   6   -1.06    0.85
  -3  14   7    5.46    0.27
  -2  14   8    6.38    0.25
  -1  14   8    3.48    0.36
   0  14   8   -2.38    0.99
   1  14   8   -2.59    0.94
   2  14   8    0.83    1.79
   3  14   7   10.46    0.19
   4  14   6    6.32    0.23
   5  14   5    3.83    0.32
   6  14   4    3.61    0.35
   6  14   3    2.18    0.47
   6  14   2    1.83    0.56
   6  15   0    1.30    1.37
   6  15   1    3.85    0.34
   6  15   2    0.69    1.04
   5  15   4    7.88    0.23
   5  15   3    9.75    0.19
   4  15   5    1.13    0.81
   4  15   6    7.75    0.24
   3  15   6    4.23    0.30
   2  15   7   -0.58    1.85
   1  15   7   -0.81    1.57
   0  15   7    7.65    0.22
  -1  15   7    5.87    0.25
  -2  15   7    3.28    0.43
  -3  15   6   -2.36    1.04
  -4  15   5    8.97    0.20
  -4  15   6    8.65    0.22
  -5  15   4   11.52    0.18
  -5  15   3    5.99    0.24
  -6  15   0    2.69    0.45
  -6  15   1    6.10    0.26
  -6  15   2   13.65    0.19
  -5  16   0    6.64    0.22
  -5  16   1    9.13    0.19
  -5  16   2    1.53    0.69
  -5  16   3   -3.94    0.71
  -4  16   4    4.24    0.31
  -3  16   5    4.19    0.31
  -2  16   6    3.03    0.41
  -1  16   6   -1.25    0.77
   0  16   6    5.40    0.27
   1  16   6    1.83    0.59
   2  16   6    1.96    0.59
   3  16   5    4.36    0.28
   4  16   4   -3.38    0.75
   4  16   3    6.40    0.23
   5  16   0    6.78    0.22
   5  16   1    5.27    0.26
   5  16   2    5.15    0.28
   5  16   3    1.70    0.61
   4  17   0   -2.30    0.94
   4  17   1    2.68    0.46
   4  17   2    8.40    0.22
   4  17   3   -2.56    0.93
   3  17   4    2.59    0.48
   3  17   3    4.56    0.31
   2  17   4    3.31    0.35
   2  17   5    3.21    0.41
   1  17   5    2.79    0.41
   0  17   5    1.91    0.53
  -1  17   5    2.47    0.45
  -2  17   4    2.96    0.39
  -2  17   5    2.76    0.45
  -3  17   4   -3.40    0.82
  -3  17   3    7.50    0.21
  -4  17   0    1.67    0.57
  -4  17   1   -1.52    1.34
  -4  17   2    3.57    0.38
  -4  17   3    2.39    0.50
  -3  18   0    4.48    0.31
  -3  18   1    2.77    0.43
  -3  18   2    3.41    0.36
  -2  18   3    4.71    0.29
  -2  18   2    0.58    1.73
  -2  18   1    3.99    0.31
  -2  18   0    2.24    0.44
  -1  18   3    2.65    0.42
  -1  18   4    0.59    1.84
   0  18   4    8.14    0.21
   0  18   3    3.87    0.32
   1  18   2    3.42    0.35
   1  18   3    2.81    0.42
   1  18   4   -1.01    1.60
   2  18   3    2.62    0.49
   2  18   2    2.28    0.47
   2  18   1   -2.35    0.88
   2  18   0   -0.87    0.90
   3  18   0    3.92    0.35
   3  18   1   -2.40    0.94
   3  18   2    3.82    0.34
   1  19   1    0.59    1.82
   1  19   0   -1.94    0.98
   0  19   0   -1.65    1.11
   0  19   1    3.22    0.40
   0  19   2    1.44    1.41
  -1  19   1    0.00    2.35
  -1  19   0   -1.55    1.22
 -10   0   4    2.89    0.44
 -10   0   3   -1.99    1.08
 -10   0   2    5.63    0.28
  -9   0   6    4.56    0.30
  -8   0   8    1.38    0.74
  -7   0   9    0.59    1.76
  -6   0  10   -2.21    1.00
  -5   0  11    1.99    0.58
  -4   0  12   -2.28    1.16
  -3   0  12    3.34    0.41
   3   0  12    7.31    0.24
   5   0  11   -2.16    1.20
   6   0  10    3.88    0.36
   7   0   9   -2.91    0.88
   8   0   8    3.35    0.38
   9   0   6    5.05    0.30
  10   0   3    0.58    1.13
  10   0   2   -0.59    1.82
  10   1   1    3.92    0.34
  10   1   2    4.54    0.30
  10   1   3    0.29    1.36
   9   1   6    4.51    0.33
   8   1   8    1.21    1.53
   7   1   9    5.53    0.29
   6   1  10    1.28    0.81
   5   1  11    8.59    0.22
   3   1  12    2.30    0.56
  -3   1  12   -1.19    1.61
  -5   1  11   -1.69    1.26
  -6   1  10    1.45    1.36
  -7   1   9    4.88    0.30
  -8   1   8   -1.47    1.34
  -9   1   6    2.39    0.48
 -10   1   2    2.08    0.57
 -10   1   3    7.09    0.23
 -10   2   3    5.99    0.27
 -10   2   2    2.11    0.55
 -10   2   1    3.06    0.41
 -10   2   0   -1.18    1.44
  -9   2   6    1.61    0.67
  -8   2   8   -0.60    1.79
  -7   2   9    3.62    0.39
  -6   2  10    1.31    0.80
  -5   2  11    2.93    0.44
  -3   2  12    7.04    0.25
   3   2  12   -2.54    0.99
   5   2  11    6.36    0.27
   6   2  10    3.96    0.35
   7   2   9    1.63    0.69
   8   2   8    6.70    0.26
   9   2   6   -2.48    1.01
  10   2   3    1.05    1.52
  10   2   2   -1.43    0.73
  10   2   1   -2.21    1.01
  10   2   0   -1.45    1.25
  10   3   0    2.48    0.45
  10   3   1    3.33    0.38
  10   3   2    3.82    0.38
  10   3   3    1.22    1.39
   9   3   6    4.69    0.31
   8   3   8    3.55    0.40
   7   3   9   -0.60    1.83
   6   3  10   -1.34    1.41
   5   3  11    2.16    0.60
   3   3  12    3.59    0.40
   2   3  12    1.78    1.31
  -2   3  12    3.87    0.37
  -3   3  12    2.83    0.50
  -5   3  11    1.97    0.61
  -6   3  10   -2.23    1.06
  -7   3   9    3.89    0.36
  -8   3   8    1.13    0.90
  -9   3   6    2.09    0.54
 -10   3   0    2.21    0.51
 -10   3   1    2.43    0.51
 -10   3   2    1.04    1.46
 -10   3   3    3.22    0.40
 -10   4   3    3.93    0.38
 -10   4   2    6.92    0.24
 -10   4   1    2.41    0.47
 -10   4   0    1.84    0.56
  -9   4   5    7.29    0.23
  -9   4   6    1.82    0.63
  -8   4   8    1.34    0.79
  -7   4   9   -1.04    1.60
  -6   4  10    0.60    1.84
  -5   4  11    0.00    2.47
  -3   4  12    3.37    0.44
  -2   4  12    3.48    0.43
   2   4  12    2.09    0.61
   3   4  12    2.63    0.52
   5   4  11    7.42    0.26
   6   4  10   -3.13    0.84
   7   4   9    1.33    0.81
   8   4   7    3.08    0.42
   9   4   5    3.12    0.42
   9   4   6    5.71    0.28
  10   4   2    3.55    0.38
  10   4   1    0.85    1.59
  10   4   0    1.04    1.45
  10   5   0    5.52    0.28
  10   5   1    1.05    1.56
  10   5   2    3.55    0.39
   9   5   5    1.41    0.74
   8   5   7    1.44    0.76
   7   5   9   -0.61    1.98
   6   5  10    1.52    0.76
   4   5  11    5.17    0.31
   2   5  12    3.78    0.39
   1   5  12    7.12    0.26
   0   5  12    4.38    0.36
  -1   5  12   -1.19    1.61
  -2   5  12    3.15    0.44
  -3   5  12    7.24    0.25
  -4   5  11    7.32    0.24
  -6   5  10   -4.10    0.73
  -7   5   9    9.14    0.22
  -8   5   7    0.84    1.68
  -9   5   5   -1.58    1.27
 -10   5   0    5.13    0.29
 -10   5   1    0.96    0.88
 -10   5   2    2.84    0.45
 -10   6   1    1.86    0.63
 -10   6   0   -1.72    1.19
  -9   6   5    5.43    0.29
  -8   6   7    5.08    0.30
  -4   6  11    8.30    0.22
  -2   6  12    4.00    0.41
  -1   6  12    5.89    0.28
   0   6  12    3.84    0.40
   1   6  12    1.81    0.70
   2   6  12    1.63    0.76
   4   6  11    2.16    0.61
   5   6  10    1.89    0.60
   7   6   8    2.43    0.50
   8   6   7    3.11    0.43
   9   6   4   -0.84    1.70
   9   6   5    9.24    0.22
  10   6   0    1.22    1.41
   9   7   4    3.33    0.36
   8   7   6    2.76    0.47
   8   7   7    0.61    1.93
   7   7   8    4.63    0.31
   6   7   9    0.81    1.04
   5   7  10    3.44    0.41
   4   7  11    2.01    0.65
   3   7  11    4.20    0.37
   1   7  12    1.87    0.68
   0   7  12    1.72    1.38
  -1   7  12    2.48    0.55
  -3   7  11   -1.45    1.50
  -4   7  11   -2.10    1.17
  -5   7  10    2.26    0.57
  -6   7   9   -2.13    1.12
  -7   7   8    3.08    0.42
  -8   7   7    7.72    0.22
  -9   7   5    8.63    0.21
  -9   7   4    4.05    0.33
  -9   8   3   -2.46    1.04
  -9   8   4    1.01    0.93
  -8   8   6    2.53    0.52
  -7   8   8    7.19    0.25
  -6   8   9    2.46    0.54
  -5   8  10    6.03    0.27
  -3   8  11    2.24    0.59
   2   8  11    4.53    0.35
   3   8  11    1.92    0.67
   5   8  10    1.72    1.38
   6   8   9    3.03    0.44
   7   8   8    5.27    0.33
   8   8   6    9.80    0.21
   9   8   2    1.73    0.60
   9   8   3    4.84    0.29
   9   8   4    2.11    0.58
   9   9   3    7.20    0.24
   9   9   2    2.24    0.53
   9   9   1    4.74    0.32
   9   9   0    3.67    0.36
   8   9   5    9.60    0.21
   8   9   6    3.21    0.42
   7   9   7    4.16    0.35
   4   9  10    3.79    0.37
   2   9  11    1.78    0.69
   1   9  11    4.82    0.32
   0   9  11    7.34    0.25
  -1   9  11    4.48    0.35
  -2   9  11   -2.07    1.17
  -3   9  11   12.48    0.20
  -4   9  10   10.03    0.21
  -7   9   7    2.38    0.54
  -8   9   5   -3.08    0.83
  -8   9   6   -1.82    1.21
  -9   9   3    2.33    0.52
  -9   9   2    6.85    0.23
  -9   9   1    3.56    0.39
  -9   9   0    3.10    0.41
  -9  10   0    6.13    0.26
  -9  10   1    3.05    0.42
  -8  10   5   -3.30    0.82
  -8  10   4    2.26    0.55
  -7  10   7    3.48    0.42
  -6  10   8   -1.89    1.16
  -5  10   9    1.59    1.33
  -4  10  10    5.01    0.32
  -3  10  10    2.70    0.48
  -1  10  11    1.13    0.93
   0  10  11   -2.17    1.23
   1  10  11    2.37    0.55
   3  10  10    1.68    1.32
   4  10  10   -1.05    1.70
   5  10   9    3.67    0.42
   6  10   8   -2.08    1.13
   7  10   7    0.86    1.81
   8  10   5    1.09    0.93
   8  10   4    7.79    0.22
   9  10   0    6.55    0.25
   9  10   1   -2.78    0.88
   8  11   3    2.10    0.54
   8  11   4    7.16    0.24
   7  11   6    6.58    0.24
   6  11   7    5.21    0.30
   4  11   9   -0.59    1.87
   3  11  10    4.21    0.37
   2  11  10    1.33    1.45
  -2  11  10    5.35    0.29
  -3  11  10    1.35    1.38
  -4  11   9    2.93    0.46
  -6  11   8   -1.72    1.28
  -7  11   6    5.02    0.29
  -8  11   3    5.18    0.27
  -8  11   4    2.36    0.50
  -8  12   3    5.17    0.30
  -8  12   2   -1.75    0.68
  -8  12   1    5.53    0.28
  -8  12   0   -2.52    0.87
  -7  12   5   -1.43    0.75
  -6  12   7    1.60    1.33
  -5  12   8    2.65    0.55
  -4  12   9    4.68    0.34
  -2  12  10    4.04    0.37
  -1  12  10    2.08    0.64
   0  12  10    4.50    0.35
   1  12  10    7.28    0.26
   2  12  10   -2.91    0.97
   3  12   9    2.79    0.45
   4  12   9    3.67    0.39
   5  12   8   11.63    0.19
   6  12   7   -1.48    1.38
   7  12   5   -2.24    1.00
   8  12   3    1.92    0.59
   8  12   2    1.78    0.62
   8  12   1   -1.46    1.24
   8  12   0   -3.14    0.85
   8  13   0    2.15    0.57
   7  13   4    3.06    0.43
   6  13   6    4.42    0.35
   5  13   7    6.11    0.26
   4  13   8    3.96    0.40
   3  13   9   -1.48    1.38
   2  13   9    1.40    0.84
  -2  13   9    3.66    0.41
  -3  13   9    4.92    0.32
  -4  13   8    1.03    1.60
  -5  13   7    7.21    0.25
  -6  13   6    3.61    0.40
  -7  13   4    3.89    0.35
  -8  13   0    2.45    0.51
  -8  13   1    4.78    0.32
  -7  14   0    6.54    0.25
  -7  14   1    4.18    0.33
  -7  14   2    3.87    0.34
  -7  14   3    4.04    0.34
  -6  14   5    2.60    0.51
  -5  14   6    1.89    0.63
  -5  14   7    1.22    1.56
  -3  14   8    2.01    0.60
  -2  14   9    5.13    0.33
  -1  14   9    2.43    0.54
   0  14   9    1.35    1.42
   1  14   9    0.86    1.84
   3  14   8    1.60    0.77
   4  14   7   10.27    0.21
   5  14   6    1.48    0.74
   6  14   5    1.47    1.36
   7  14   0    6.46    0.25
   7  14   1    7.09    0.23
   7  14   2    5.18    0.29
   7  14   3    1.43    0.75
   7  15   0    9.24    0.21
   6  15   3   -1.88    1.20
   6  15   4    5.77    0.29
   5  15   6    0.61    2.02
   5  15   5    7.24    0.24
   4  15   7    5.04    0.32
   3  15   7    1.51    0.76
   2  15   8    3.29    0.44
   1  15   8   -3.86    0.74
   0  15   8    1.07    0.89
  -1  15   8    1.69    1.28
  -2  15   8    1.88    0.67
  -3  15   7    4.21    0.33
  -4  15   7   -0.86    1.67
  -5  15   6    2.58    0.49
  -5  15   5    4.64    0.31
  -6  15   3   -1.57    1.32
  -6  15   4    2.83    0.46
  -7  15   1    1.06    1.56
  -7  15   0    8.36    0.23
  -6  16   2    5.08    0.29
  -6  16   1    1.47    1.39
  -6  16   0   -1.34    1.36
  -5  16   4    2.72    0.50
  -5  16   5    5.01    0.32
  -4  16   6    4.02    0.37
  -4  16   5    2.58    0.52
  -3  16   6    6.68    0.25
  -3  16   7    1.17    0.90
  -2  16   7    4.19    0.34
  -1  16   7    1.19    1.38
   0  16   7    5.03    0.30
   1  16   7   -1.97    1.30
   2  16   7   -1.34    1.40
   3  16   6   -1.45    1.41
   4  16   6    2.70    0.53
   4  16   5    3.06    0.43
   5  16   4    2.84    0.47
   6  16   2    3.79    0.36
   6  16   1    6.34    0.24
   6  16   0   -0.85    1.64
   5  17   3    3.14    0.45
   5  17   2    2.73    0.45
   5  17   1   -1.46    1.25
   5  17   0   -0.84    1.50
   4  17   4    5.74    0.27
   3  17   5    3.02    0.46
   2  17   6    5.06    0.32
   1  17   6   -0.64    1.16
   0  17   6    2.72    0.45
   0  17   7    2.14    0.59
  -1  17   6    4.83    0.32
  -2  17   6    3.73    0.38
  -3  17   5   -1.19    1.49
  -4  17   4    2.19    0.53
  -4  17   5   -1.22    1.66
  -5  17   3    4.41    0.33
  -5  17   2    0.60    1.86
  -5  17   1    5.63    0.27
  -5  17   0    2.33    0.48
  -4  18   3    3.41    0.39
  -4  18   2   -0.50    1.21
  -4  18   1    1.34    1.36
  -4  18   0    2.45    0.47
  -3  18   3    1.69    0.66
  -3  18   4    4.58    0.31
  -2  18   5   -0.85    1.82
  -2  18   4    3.33    0.39
  -1  18   5    4.55    0.34
   0  18   5    5.12    0.29
   1  18   5    4.10    0.35
   2  18   5    1.72    1.31
   2  18   4    1.46    1.44
   3  18   3    3.92    0.35
   3  18   4    2.15    0.56
   4  18   3    4.38    0.33
   4  18   2   -2.33    1.01
   4  18   1   -1.69    1.19
   4  18   0   -2.30    0.95
   3  19   2    0.00    2.39
   3  19   1    3.41    0.41
   3  19   0    3.21    0.42
   2  19   0    3.05    0.40
   2  19   1    4.66    0.29
   2  19   2    1.97    0.58
   2  19   3    1.36    0.81
   1  19   4    4.27    0.34
   1  19   3    3.24    0.43
   1  19   2    2.43    0.46
   0  19   3    1.46    0.73
   0  19   4    5.46    0.29
  -1  19   4    5.53    0.27
  -1  19   3    1.52    0.70
  -1  19   2    6.07    0.25
  -2  19   0    3.31    0.37
  -2  19   1   -0.40    1.25
  -2  19   2    2.47    0.49
  -2  19   3   -1.91    1.23
  -3  19   2    4.13    0.37
  -3  19   1   -3.01    0.90
  -3  19   0    3.20    0.40
  -1  20   0    2.13    0.58
  -1  20   1   -2.10    1.12
   0  20   1   -0.61    1.85
   0  20   0    4.38    0.34
   1  20   0    2.37    0.52
   1  20   1    3.83    0.35
 -10   0   5   -1.07    1.60
  -9   0   7    1.59    0.70
  -8   0   9   -2.06    1.13
  -7   0  10    8.26    0.23
  -6   0  11   -2.14    1.17
  -5   0  12    3.95    0.41
  -2   0  13   -1.64    1.44
  -1   0  13   -2.12    1.17
   0   0  13    1.72    0.71
   1   0  13    1.38    1.52
   2   0  13    1.27    0.86
   4   0  12    4.73    0.36
   6   0  11   -1.52    0.77
   7   0  10    2.24    0.57
   8   0   9   -1.77    1.24
   9   0   7   -1.95    1.11
  10   0   5   -1.04    0.93
  10   0   4   -1.37    1.27
  10   1   4    3.68    0.38
  10   1   5   -1.25    1.56
   9   1   7    4.23    0.35
   8   1   9    4.01    0.38
   7   1  10    1.37    0.82
   6   1  11   -2.41    1.09
   4   1  12   -0.61    1.99
   2   1  13   -1.86    1.34
   1   1  13    6.14    0.28
   0   1  13    2.62    0.52
  -1   1  13    2.71    0.52
  -2   1  13   -1.07    1.66
  -4   1  12    5.62    0.32
  -6   1  11    0.84    1.10
  -7   1  10    0.79    1.12
  -8   1   9    4.38    0.34
  -9   1   7    1.74    1.31
 -10   1   4    7.10    0.24
 -10   1   5   -2.63    1.06
 -10   2   5    1.08    1.58
 -10   2   4   -1.62    1.28
  -9   2   7    1.38    1.34
  -8   2   9    6.13    0.28
  -7   2  10   -4.10    0.72
  -6   2  11    7.61    0.24
  -4   2  12    4.36    0.36
  -2   2  13    2.28    0.61
  -1   2  13    5.01    0.33
   0   2  13    5.54    0.32
   1   2  13    5.86    0.31
   2   2  13   -1.89    0.69
   4   2  12   -0.61    1.93
   6   2  11    6.81    0.26
   7   2  10    3.31    0.45
   8   2   9    5.81    0.29
   9   2   7    2.46    0.54
  10   2   5    1.66    1.33
  10   2   4   -0.87    1.71
  10   3   4   -1.51    1.26
   9   3   7    3.30    0.42
   7   3  10   -0.62    1.98
   6   3  11    3.44    0.43
   4   3  12    4.27    0.37
   2   3  13   -1.40    1.60
   1   3  13    4.55    0.37
   0   3  13    1.24    1.63
  -1   3  13    5.47    0.32
  -2   3  13    4.73    0.36
  -4   3  12   -4.51    0.69
  -6   3  11    5.68    0.28
  -7   3  10    0.62    1.93
  -8   3   9    5.07    0.34
  -9   3   7    5.25    0.31
 -10   3   4   -3.25    0.86
 -10   3   5   -1.08    1.54
 -10   4   4    1.74    0.66
  -9   4   7   -1.24    1.53
  -7   4  10    3.59    0.41
  -6   4  11   -2.43    1.05
  -4   4  12    3.08    0.49
  -2   4  13   -1.98    1.30
  -1   4  13    1.47    0.85
   0   4  13   -1.75    1.34
   1   4  13   -2.33    1.16
   4   4  12    2.69    0.51
   8   4   8   -0.86    1.70
   9   4   7    2.70    0.53
  10   4   4   -2.14    1.09
  10   4   3    4.62    0.31
  10   5   3    3.35    0.41
  10   5   4    3.31    0.44
   9   5   6    3.03    0.46
   8   5   8   -1.02    0.95
   5   5  11   -2.67    1.02
   4   5  12    2.13    0.66
   3   5  12   -2.73    1.01
   1   5  13    1.45    0.84
   0   5  13    3.16    0.48
  -1   5  13    3.55    0.43
  -4   5  12    0.00    2.54
  -5   5  11    2.56    0.54
  -8   5   8    5.40    0.29
  -9   5   7    5.34    0.30
  -9   5   6    3.88    0.37
 -10   5   3    3.56    0.40
 -10   5   4    0.00    2.35
 -10   6   3    6.58    0.26
 -10   6   2    3.86    0.37
  -9   6   6    4.07    0.37
  -8   6   8    6.34    0.28
  -7   6   9    4.32    0.36
  -6   6  10    4.74    0.34
  -5   6  11    2.59    0.53
  -3   6  12    1.60    0.81
   3   6  12    2.20    0.65
   5   6  11    3.09    0.47
   6   6  10   -1.23    1.57
   7   6   9    1.23    1.46
   8   6   8    1.65    1.43
   9   6   6    2.72    0.52
  10   6   3    5.04    0.30
  10   6   2    2.05    0.56
  10   6   1    0.78    1.02
  10   7   0    2.01    0.57
  10   7   1    1.38    1.43
  10   7   2    1.65    1.35
   9   7   6    3.23    0.45
   9   7   5    3.70    0.36
   7   7   9   -1.96    1.23
   6   7  10    1.52    1.45
   5   7  11    2.89    0.50
   3   7  12   -2.72    1.13
   2   7  12    1.63    1.34
  -2   7  12   -1.62    1.36
  -3   7  12   -0.88    1.89
  -5   7  11    4.94    0.35
  -6   7  10    2.17    0.60
  -7   7   9    4.23    0.37
  -8   7   8   -1.47    0.80
  -9   7   6    3.14    0.45
 -10   7   0   -1.63    1.29
 -10   7   1    5.48    0.28
 -10   7   2   -2.48    1.00
 -10   7   3    2.90    0.47
 -10   8   1    3.54    0.41
 -10   8   0    2.40    0.53
  -9   8   5    5.05    0.33
  -8   8   7    3.83    0.38
  -7   8   9    1.93    0.65
  -6   8  10    5.38    0.33
  -4   8  11   -1.56    0.82
  -2   8  12    3.11    0.46
  -1   8  12    2.80    0.52
   0   8  12    1.07    1.70
   1   8  12    1.39    0.86
   2   8  12    1.39    1.59
   4   8  11   -2.13    1.27
   8   8   7   -1.23    1.52
   9   8   5    6.19    0.28
  10   8   1    3.45    0.39
  10   8   0    3.59    0.38
   9   9   4    1.90    0.61
   8   9   7    4.84    0.33
   7   9   8    6.59    0.28
   6   9   9    3.84    0.39
   5   9  10    3.86    0.40
   4   9  11    6.63    0.28
   3   9  11   -2.73    1.05
   1   9  12    1.25    1.67
   0   9  12    4.55    0.35
  -1   9  12   -2.57    1.09
  -4   9  11   10.04    0.23
  -5   9  10   -1.93    0.69
  -6   9   9    2.85    0.47
  -7   9   8    1.51    1.41
  -8   9   7    5.64    0.29
  -9   9   5    3.81    0.39
  -9   9   4    2.51    0.51
  -9  10   2   -2.66    0.97
  -9  10   3   -1.85    1.26
  -9  10   4    6.60    0.25
  -8  10   6    1.30    0.87
  -7  10   8    4.94    0.33
  -6  10   9    5.76    0.30
  -5  10  10    4.13    0.38
  -3  10  11    2.07    0.66
  -2  10  11   -1.36    1.58
   2  10  11    4.47    0.36
   3  10  11    0.62    2.14
   5  10  10    3.09    0.50
   6  10   9   -1.76    1.26
   7  10   8   -3.86    0.77
   8  10   6    0.00    2.54
   9  10   2    2.12    0.57
   9  10   3    3.81    0.35
   9  10   4    1.26    1.54
   9  11   2    3.26    0.46
   9  11   1   -1.38    1.36
   9  11   0    3.76    0.39
   8  11   5   -3.20    0.93
   7  11   7    8.08    0.24
   6  11   8    4.22    0.37
   5  11   9    4.19    0.36
   4  11  10   -1.51    1.35
   2  11  11    0.99    1.05
   1  11  11   -1.85    1.34
   0  11  11   -3.41    0.85
  -1  11  11    0.87    1.96
  -2  11  11    1.08    1.70
  -4  11  10   -2.04    1.23
  -5  11   9    1.95    0.67
  -7  11   7    4.69    0.32
  -8  11   5    5.76    0.28
  -9  11   3    5.99    0.28
  -9  11   2    5.73    0.29
  -9  11   1    7.59    0.24
  -9  11   0    3.40    0.43
  -8  12   5   -1.77    1.27
  -8  12   4    3.58    0.41
  -7  12   6    4.86    0.31
  -6  12   8    0.42    1.36
  -5  12   9    5.47    0.30
  -3  12  10    2.88    0.51
   0  12  11   -1.40    1.56
   3  12  10    2.93    0.51
   5  12   9    3.78    0.41
   6  12   8   -2.33    1.12
   7  12   6    4.21    0.36
   8  12   4   -2.95    0.92
   8  13   1    3.18    0.41
   8  13   2    4.21    0.34
   8  13   3    8.65    0.23
   7  13   6    3.66    0.41
   7  13   5    1.74    1.33
   6  13   7    3.99    0.40
   5  13   8    0.62    2.00
   4  13   9    7.23    0.27
   2  13  10    4.90    0.35
   1  13  10   -1.62    1.33
   0  13  10    3.62    0.41
  -1  13  10    3.83    0.41
  -2  13  10    4.78    0.35
  -4  13   9    8.51    0.24
  -5  13   8    2.01    0.64
  -6  13   7    6.70    0.27
  -7  13   6    6.00    0.29
  -7  13   5    1.28    0.86
  -8  13   2    3.24    0.42
  -8  13   3    1.52    1.29
  -8  14   2   -2.43    1.04
  -8  14   1    5.78    0.28
  -8  14   0   -1.97    1.22
  -7  14   4   -2.37    1.09
  -7  14   5    0.00    2.50
  -6  14   6    3.90    0.38
  -4  14   8    1.69    0.77
  -3  14   9    1.89    0.70
   0  14  10    3.97    0.39
   2  14   9    2.10    0.62
   3  14   9    6.07    0.29
   4  14   8    4.94    0.32
   5  14   7    0.61    1.88
   6  14   6    0.00    2.42
   7  14   4    1.75    0.68
   7  14   5    2.53    0.52
   8  14   1    2.04    0.62
   8  14   0    2.47    0.52
   7  15   3   -2.77    0.89
   7  15   2    4.81    0.32
   7  15   1    1.06    1.55
   6  15   5    2.62    0.58
   5  15   7    3.15    0.50
   4  15   8   -1.09    1.77
   3  15   8    4.73    0.34
   2  15   9    1.66    1.35
   1  15   9    2.58    0.55
   0  15   9    3.62    0.41
  -1  15   9    4.00    0.39
  -2  15   9    2.43    0.59
  -3  15   8   -1.22    1.49
  -4  15   8    3.84    0.41
  -5  15   7    5.18    0.32
  -6  15   5    1.38    1.49
  -7  15   3   -1.38    1.31
  -7  15   2    1.18    0.84
  -7  16   0   -2.65    0.86
  -7  16   1    4.33    0.37
  -6  16   4   -1.07    1.55
  -6  16   3    2.43    0.53
  -5  16   6    3.14    0.47
  -4  16   7   -3.11    0.92
  -2  16   8    2.50    0.53
  -1  16   8    1.54    0.79
   0  16   8   -1.93    1.23
   1  16   8    1.92    0.64
   2  16   8    7.90    0.24
   3  16   7    0.83    1.09
   4  16   7    6.37    0.29
   5  16   5   -2.86    0.91
   5  16   6    4.11    0.40
   6  16   4    1.72    0.72
   6  16   3    1.25    0.87
   7  16   0   -3.18    0.90
   7  16   1   -1.08    1.66
   6  17   0    1.19    0.88
   6  17   1   -0.87    1.72
   6  17   2    5.52    0.29
   5  17   4    3.93    0.37
   4  17   5    4.42    0.35
   4  17   6    1.77    1.31
   3  17   6    3.62    0.38
   2  17   7   -3.65    0.84
   1  17   7    3.33    0.44
  -1  17   7    0.98    1.03
  -2  17   7   -1.51    1.46
  -3  17   7    1.13    0.95
  -3  17   6    4.03    0.39
  -4  17   6   -1.16    0.89
  -5  17   5    3.43    0.41
  -5  17   4    2.34    0.53
  -6  17   0    1.07    0.93
  -6  17   1   -2.14    1.05
  -6  17   2    2.45    0.51
  -5  18   0    2.85    0.43
  -5  18   1   -1.37    1.37
  -5  18   2    2.33    0.54
  -5  18   3    3.09    0.43
  -4  18   4   -3.48    0.88
  -3  18   5    5.29    0.30
  -2  18   6    1.52    1.45
  -1  18   6    1.51    1.33
   0  18   6   -1.28    0.81
   1  18   6    3.50    0.43
   2  18   6    3.67    0.40
   3  18   5   -3.13    0.90
   4  18   4   -2.54    1.05
   5  18   0    2.13    0.57
   5  18   1    2.37    0.52
   5  18   2    5.86    0.28
   5  18   3    2.45    0.55
   4  19   0    1.51    1.31
   4  19   1    1.75    1.35
   4  19   2    0.00    2.40
   3  19   4   -2.78    0.96
   3  19   3   -1.23    1.46
   2  19   4    1.67    0.68
   2  19   5    2.43    0.51
   1  19   5   -1.95    1.17
   0  19   5    1.64    1.35
  -1  19   5    3.91    0.38
  -2  19   4    1.37    1.50
  -2  19   5    1.08    1.66
  -3  19   4    4.28    0.35
  -3  19   3    2.76    0.46
  -4  19   0    0.87    1.69
  -4  19   1    0.00    2.41
  -4  19   2    7.65    0.24
  -4  19   3   -1.09    1.64
  -3  20   0   -2.41    1.00
  -3  20   1   -1.39    1.33
  -2  20   3    1.25    1.51
  -2  20   2    1.07    1.60
  -2  20   1    1.23    1.47
  -2  20   0    2.54    0.52
  -1  20   2    7.09    0.24
  -1  20   3    1.24    1.51
   0  20   4    1.09    0.95
   0  20   3    6.76    0.26
   0  20   2    4.52    0.32
   1  20   2    1.14    0.90
   1  20   3    1.08    0.99
   2  20   3   -1.53    1.39
   2  20   2    5.04    0.30
   2  20   1    2.18    0.56
   2  20   0    3.06    0.42
   3  20   0   -1.87    1.24
   3  20   1   -2.07    1.14
   0  21   0    1.26    1.34
 -11   0   0    2.60    0.52
 -11   0   1   -2.00    1.17
 -11   0   2    6.00    0.27
 -10   0   6    3.36    0.42
  -9   0   8    5.69    0.28
  -3   0  13   -0.89    1.75
   3   0  13   -0.89    1.82
   5   0  12   -2.09    1.18
  11   0   0    2.75    0.49
  11   0   1   -3.09    0.88
  11   1   1    1.27    1.37
  11   1   0    6.29    0.27
   5   1  12    5.05    0.33
   3   1  13   -2.27    1.16
  -3   1  13    1.26    1.57
  -5   1  12    1.67    1.30
  -9   1   8    3.68    0.39
 -10   1   6    0.64    1.80
 -11   1   2    6.66    0.28
 -11   1   1    1.42    1.33
 -11   1   0    6.29    0.27
 -11   2   0    2.18    0.57
 -11   2   1    1.88    0.62
  -9   2   8    1.81    0.68
  -5   2  12    3.32    0.45
  -3   2  13    6.08    0.31
   3   2  13    4.16    0.41
   5   2  12    4.05    0.43
  11   2   0   -1.55    1.27
  11   2   1    3.94    0.40
  11   3   0    1.28    1.34
  10   3   5    4.41    0.36
   8   3   9    3.85    0.40
   5   3  12    2.33    0.63
   3   3  13   -2.20    1.17
  -3   3  13   -2.37    1.22
  -5   3  12    3.42    0.49
 -11   3   0   -1.10    1.48
 -10   4   5    0.80    1.04
  -8   4   9   -2.09    1.22
  -5   4  12   -0.90    1.89
   2   4  13    0.00    1.79
   6   4  11    3.11    0.47
   7   4  10   -1.09    1.67
   8   4   9    0.00    2.55
  10   4   5   -1.25    0.87
   9   5   7    2.01    0.66
   7   5  10    4.06    0.39
   6   5  11    3.87    0.40
   2   5  13    1.27    1.68
  -2   5  13    1.64    0.82
  -6   5  11    7.87    0.26
  -7   5  10    3.23    0.44
  -8   5   9    8.48    0.24
 -10   5   5    1.06    0.92
 -10   6   4   -0.89    1.66
  -9   6   7    5.76    0.30
  -4   6  12    5.64    0.31
  -1   6  13   -2.53    1.21
   0   6  13    0.74    1.25
   1   6  13    6.20    0.31
   4   6  12    3.45    0.48
  10   6   4    5.15    0.31
  10   7   3    5.67    0.28
   8   7   8   -1.41    1.54
  -4   7  12   -2.69    1.06
 -10   7   4    2.82    0.50
 -10   8   3    8.13    0.24
 -10   8   2    3.62    0.38
  -9   8   6    6.81    0.27
  -8   8   8    5.20    0.33
  -5   8  11   -2.36    1.14
  -3   8  12   -3.39    0.95
   3   8  12   -3.51    0.91
   5   8  11   -2.00    1.35
   6   8  10    1.71    0.73
   7   8   9    0.00    2.58
   9   8   6    2.33    0.57
  10   8   3    4.17    0.35
  10   8   2   -1.89    1.24
  10   9   0    6.39    0.28
  10   9   1   -2.28    1.13
   9   9   5    1.42    0.83
   2   9  12    4.08    0.40
  -2   9  12    1.55    1.50
  -6   9  10    3.64    0.45
  -7   9   9    8.50    0.24
 -10   9   0    5.97    0.30
 -10   9   1    3.84    0.40
  -8  10   7    4.46    0.35
  -4  10  11    2.32    0.62
  -1  10  12    6.20    0.32
   0  10  12    4.42    0.38
   1  10  12    5.18    0.35
   4  10  11    1.80    1.38
   9  11   3    1.63    0.71
   8  11   6    4.94    0.34
   6  11   9   -1.27    1.53
   3  11  11   -1.26    1.68
  -3  11  11    5.45    0.31
  -5  11  10   10.32    0.22
  -6  11   9    3.81    0.39
  -7  11   8    0.90    1.81
  -8  11   6    5.00    0.31
  -9  12   0    2.12    0.59
  -9  12   1    3.18    0.45
  -9  12   2    1.56    0.74
  -7  12   7    0.68    1.18
  -4  12  10    2.41    0.61
  -2  12  11    0.64    2.02
  -1  12  11    3.38    0.44
   1  12  11    6.26    0.29
   2  12  11    8.34    0.26
   4  12  10    9.56    0.23
   7  12   7    1.55    1.41
   8  12   5   -0.43    1.38
   9  12   0    2.21    0.56
   9  12   1    1.61    0.69
   9  12   2   -3.04    0.95
   8  13   4    1.72    0.70
   3  13  10    3.70    0.44
  -3  13  10    1.77    0.75
  -5  13   9   -1.90    1.36
  -6  13   8   -0.96    1.04
  -8  13   4    3.61    0.43
  -8  14   3    3.84    0.38
  -6  14   7    1.69    0.70
  -5  14   8    7.18    0.25
  -4  14   9    0.86    1.14
  -2  14  10    4.02    0.40
  -1  14  10    3.68    0.41
   1  14  10    5.64    0.31
   2  14  10    1.56    1.43
   4  14   9    2.50    0.57
   5  14   8    0.89    1.78
   6  14   7    1.29    0.92
   8  14   3    4.21    0.37
   8  14   2    8.16    0.24
   7  15   4    2.77    0.51
   6  15   6    3.19    0.46
   3  15   9    5.11    0.36
  -3  15   9    2.70    0.54
  -6  15   6    2.88    0.50
  -7  15   4    2.12    0.64
  -7  16   2    1.92    0.62
  -6  16   5    6.26    0.28
  -3  16   8   -2.35    1.17
  -1  16   9    0.64    2.00
   0  16   9    3.41    0.44
   1  16   9    0.00    2.60
   3  16   8   -2.09    1.21
   6  16   5   -1.09    1.74
   7  16   2    0.30    1.44
   6  17   3    2.66    0.52
   5  17   5    1.60    0.72
   3  17   7   -3.38    0.92
   1  17   8    1.55    1.38
   0  17   8    1.36    0.87
  -1  17   8   -1.26    1.59
  -6  17   3    5.59    0.29
  -6  18   0   -1.10    1.56
  -5  18   4    0.64    2.01
  -4  18   5   -1.54    1.35
  -3  18   6    0.63    2.08
  -2  18   7   -1.27    1.68
  -1  18   7   -1.09    1.64
   0  18   7    0.63    2.02
   1  18   7    5.99    0.29
   3  18   6    2.12    0.63
   4  18   5   -2.67    1.06
   5  18   4   -0.90    1.79
   6  18   0   -3.48    0.85
   5  19   1   -2.37    1.10
   5  19   0    1.75    0.68
   4  19   3    4.26    0.35
   3  19   5    3.01    0.46
   1  19   6   -0.89    1.72
   0  19   6   -1.54    1.43
  -1  19   6   -2.19    1.16
  -3  19   5    1.10    0.95
  -4  19   4    1.89    0.66
  -5  19   1    3.75    0.38
  -5  19   0    3.13    0.42
  -3  20   2   -1.73    0.70
  -3  20   3    0.00    2.43
  -2  20   4    2.38    0.61
  -1  20   4    4.31    0.37
   1  20   4    1.89    0.64
   2  20   4    3.64    0.40
   3  20   2    1.42    0.82
   3  20   3    5.46    0.31
   2  21   0   -1.22    0.90
   2  21   1    3.27    0.46
   1  21   2    1.68    1.39
   1  21   1    5.10    0.32
   1  21   0    1.26    1.33
   0  21   1   -1.40    1.41
   0  21   2    2.97    0.50
  -1  21   2   -0.90    1.79
  -1  21   1   -1.99    1.24
  -1  21   0    2.10    0.59
  -2  21   0   -1.55    0.78
  -2  21   1    6.91    0.27
 -11   0  -1   -0.86    1.05
 -11   0   0    1.92    0.64
  -5   0 -12   -0.63    1.79
  -3   0 -13    1.10    1.59
   3   0 -13   -2.08    1.08
   9   0  -8    5.49    0.28
  10   0  -6   -1.10    1.55
  11   0  -2    5.25    0.31
  11   0  -1   -1.41    1.49
  11   0   0    1.10    1.53
  11   1   0    5.83    0.30
  11   1  -1   -1.41    1.32
  11   1  -2    6.99    0.25
  10   1  -6    0.64    1.80
   9   1  -8    2.41    0.54
   5   1 -12    1.54    1.31
   3   1 -13   -2.08    1.08
  -3   1 -13    0.00    2.43
  -5   1 -12    4.92    0.32
 -11   1   0    6.10    0.27
 -11   1  -1    2.68    0.46
 -11   2  -1    4.67    0.33
 -11   2   0    1.42    1.44
  -5   2 -12    3.85    0.41
  -3   2 -13    5.21    0.30
   3   2 -13    5.80    0.29
   5   2 -12   -2.35    1.00
   9   2  -8    2.01    0.58
  11   2  -1    1.10    1.55
  11   2   0   -2.83    0.93
  11   3   0   -2.54    1.04
   5   3 -12    4.75    0.33
   3   3 -13    1.56    1.42
  -3   3 -13    2.01    0.58
  -5   3 -12   -1.68    1.38
  -8   3  -9    3.69    0.40
 -10   3  -5    4.60    0.34
 -11   3   0    1.02    0.96
 -10   4  -5   -3.34    0.86
  -8   4  -9    2.95    0.48
  -7   4 -10    0.00    2.24
  -6   4 -11    3.38    0.40
  -2   4 -13   -1.40    1.44
   5   4 -12    0.00    2.26
   8   4  -9   -2.75    0.93
  10   4  -5    0.63    1.87
  10   5  -5   -2.28    1.04
   8   5  -9    8.59    0.23
   7   5 -10    3.04    0.43
   6   5 -11    7.62    0.24
   2   5 -13   -1.09    1.60
  -2   5 -13    2.14    0.59
  -6   5 -11    3.77    0.38
  -7   5 -10    4.33    0.35
  -9   5  -7   -1.99    1.17
 -10   6  -4    4.88    0.32
  -9   6  -7    1.69    1.24
  -4   6 -12    4.66    0.32
  -1   6 -13    6.78    0.26
   0   6 -13    0.00    2.42
   1   6 -13    3.05    0.46
   4   6 -12    5.12    0.29
   9   6  -7    6.00    0.27
  10   6  -4    0.63    1.95
  10   7  -4   -1.68    1.41
   4   7 -12    1.28    1.49
  -8   7  -8    3.17    0.43
 -10   7  -3    5.11    0.31
 -10   8  -2    1.52    0.73
 -10   8  -3    3.51    0.42
  -9   8  -6    0.64    1.84
  -7   8  -9    1.39    0.78
  -6   8 -10   -2.17    1.08
  -5   8 -11    2.33    0.55
  -3   8 -12    1.55    1.41
   3   8 -12    2.08    0.58
   5   8 -11   -1.26    1.57
   8   8  -8    4.76    0.34
   9   8  -6    7.44    0.25
  10   8  -2    3.48    0.39
  10   8  -3    8.40    0.24
  10   9  -1    3.96    0.37
  10   9   0    6.67    0.26
   7   9  -9    8.52    0.23
   6   9 -10    3.76    0.40
   2   9 -12    1.14    0.88
  -2   9 -12    3.19    0.43
  -9   9  -5    2.64    0.52
 -10   9  -1   -1.55    1.38
 -10   9   0    6.26    0.28
  -4  10 -11    2.63    0.50
  -1  10 -12    5.19    0.30
   0  10 -12    4.22    0.36
   1  10 -12    6.63    0.27
   4  10 -11    1.42    1.38
   8  10  -7    3.51    0.40
   8  11  -6    4.28    0.34
   7  11  -8   -1.40    0.75
   6  11  -9    2.79    0.50
   5  11 -10   10.12    0.22
   3  11 -11    4.62    0.34
  -3  11 -11   -1.41    1.35
  -6  11  -9    1.27    1.49
  -8  11  -6    5.21    0.31
  -9  11  -3    0.89    1.64
  -9  12  -2    0.64    1.89
  -9  12  -1   -2.35    1.04
  -9  12   0    1.87    0.65
  -8  12  -5    2.62    0.48
  -7  12  -7    3.07    0.44
  -4  12 -10   10.15    0.21
  -2  12 -11    8.49    0.23
  -1  12 -11    5.66    0.30
   1  12 -11    3.12    0.43
   2  12 -11    1.42    1.44
   4  12 -10    2.27    0.54
   7  12  -7   -1.98    1.14
   9  12  -2   -2.28    1.11
   9  12  -1    2.88    0.51
   9  12   0    0.89    1.72
   8  13  -4    3.53    0.43
   6  13  -8   -0.90    1.66
   5  13  -9    1.56    1.29
   3  13 -10   -1.09    1.56
  -3  13 -10    3.57    0.40
  -8  13  -4   -2.27    1.03
  -8  14  -2    7.24    0.25
  -8  14  -3    3.70    0.41
  -6  14  -7    2.38    0.55
  -5  14  -8   -1.99    1.18
  -4  14  -9    2.85    0.46
  -2  14 -10    0.00    2.30
  -1  14 -10    4.99    0.32
   1  14 -10    3.39    0.40
   2  14 -10    3.14    0.43
   4  14  -9    1.18    0.87
   5  14  -8    5.82    0.30
   6  14  -7    1.41    1.34
   8  14  -2    0.68    1.14
   8  14  -3    4.23    0.36
   7  15  -4    1.67    1.33
   6  15  -6    3.69    0.38
   3  15  -9   -1.42    1.43
  -3  15  -9    5.12    0.32
  -6  15  -6    2.35    0.58
  -7  15  -4    0.00    1.67
  -7  16  -2    1.05    0.91
  -6  16  -5    3.05    0.45
  -3  16  -8    0.53    1.24
  -1  16  -9    1.47    0.77
   0  16  -9    3.44    0.39
   1  16  -9   -2.69    0.89
   3  16  -8   -1.99    1.25
   6  16  -5    6.40    0.27
   7  16  -2    1.42    0.78
   6  17  -3    5.93    0.26
   1  17  -8    1.10    1.49
   0  17  -8    1.25    0.81
  -1  17  -8    1.80    0.65
  -3  17  -7   -2.43    0.93
  -5  17  -5    1.87    0.61
  -6  17  -3    3.25    0.43
  -6  18   0    2.63    0.48
  -5  18  -4    1.10    1.49
  -4  18  -5    0.89    1.66
  -3  18  -6    1.97    0.61
  -1  18  -7    5.17    0.32
   0  18  -7   -3.01    0.83
   1  18  -7    2.33    0.52
   2  18  -7    3.23    0.42
   3  18  -6    4.25    0.34
   4  18  -5    1.09    1.55
   5  18  -4    1.88    0.66
   6  18   0   -2.46    0.99
   5  19   0    2.03    0.63
   5  19  -1    4.19    0.34
   3  19  -5   -3.23    0.87
   1  19  -6    1.27    1.47
   0  19  -6    0.90    1.58
  -1  19  -6   -3.29    0.84
  -3  19  -5   -1.18    0.91
  -4  19  -3    4.38    0.32
  -5  19   0    1.30    0.88
  -5  19  -1   -1.27    1.45
  -3  20  -3    4.49    0.37
  -3  20  -2    2.35    0.54
  -2  20  -4    3.58    0.40
  -1  20  -4   -1.54    1.37
   1  20  -4    4.14    0.35
   2  20  -4    1.68    1.41
   3  20  -3   -2.61    0.96
   3  20  -2    1.87    0.62
   2  21  -1    7.00    0.26
   2  21   0    1.42    1.41
   1  21   0   -1.66    1.34
   1  21  -1    1.55    1.36
   1  21  -2    1.67    0.72
   0  21  -2    1.68    1.36
   0  21  -1    1.09    1.57
  -1  21   0    1.67    1.26
  -1  21  -1    5.22    0.30
  -1  21  -2   -2.61    0.97
  -2  21  -1    3.14    0.46
  -2  21   0   -1.55    1.32
 -10   0  -4   -1.06    1.53
 -10   0  -5   -2.78    0.94
  -9   0  -7   -0.62    1.79
  -8   0  -9   -0.67    1.11
  -7   0 -10   -2.17    0.57
  -6   0 -11   -0.62    1.90
  -4   0 -12    5.08    0.30
  -2   0 -13    1.65    1.28
  -1   0 -13    0.59    1.13
   0   0 -13   -1.83    1.17
   1   0 -13   -1.73    1.18
   2   0 -13    0.60    1.10
   5   0 -12    3.97    0.37
   6   0 -11   -2.23    1.05
   7   0 -10    7.37    0.25
   8   0  -9    1.04    0.87
   9   0  -7    1.23    1.44
  10   0  -5    1.64    0.65
  10   1  -5    2.01    0.58
  10   1  -4    7.05    0.25
   9   1  -7    2.90    0.45
   8   1  -9    3.03    0.44
   7   1 -10   -2.62    0.94
   6   1 -11   -1.96    1.16
   4   1 -12    6.43    0.24
   2   1 -13   -1.49    0.74
   1   1 -13    0.66    1.11
   0   1 -13    1.23    1.48
  -1   1 -13    6.00    0.26
  -2   1 -13   -1.86    1.19
  -4   1 -12    0.87    1.71
  -6   1 -11   -0.84    1.01
  -7   1 -10    1.50    0.74
  -8   1  -9    3.67    0.40
  -9   1  -7    3.56    0.40
 -10   1  -5   -1.08    1.45
 -10   1  -4    4.30    0.32
 -10   2  -4    1.51    1.37
 -10   2  -5    0.30    1.37
  -9   2  -7    2.50    0.49
  -8   2  -9    5.80    0.29
  -7   2 -10   -0.88    1.72
  -6   2 -11    6.83    0.26
  -4   2 -12   -1.84    1.15
  -2   2 -13   -1.08    1.47
  -1   2 -13    6.17    0.27
   0   2 -13    5.94    0.28
   1   2 -13    4.38    0.34
   2   2 -13    2.47    0.51
   4   2 -12    4.56    0.31
   6   2 -11    7.60    0.23
   7   2 -10    1.74    0.60
   8   2  -9    5.42    0.28
   9   2  -7   -2.68    0.91
  10   2  -4   -3.11    0.80
  10   2  -5    1.00    0.91
  10   3  -5   -1.87    1.17
  10   3  -4    1.07    1.55
   9   3  -7    5.30    0.29
   8   3  -9    4.98    0.32
   7   3 -10   -2.71    0.84
   6   3 -11    5.61    0.28
   4   3 -12   -1.37    1.33
   2   3 -13    4.65    0.32
   1   3 -13    5.37    0.29
   0   3 -13   -2.82    0.91
  -1   3 -13    4.92    0.30
  -2   3 -13   -2.99    0.90
  -4   3 -12    4.07    0.34
  -6   3 -11    2.87    0.51
  -7   3 -10   -2.86    0.90
  -9   3  -7    2.24    0.57
 -10   3  -4   -2.22    1.04
 -10   4  -3    3.78    0.37
 -10   4  -4    1.16    0.84
  -9   4  -7    1.54    1.44
  -8   4  -8    0.83    1.05
  -4   4 -12   -2.84    0.98
  -1   4 -13    1.53    1.28
   0   4 -13    1.39    1.32
   1   4 -13    1.40    1.36
   2   4 -13    1.41    1.38
   4   4 -12    2.94    0.44
   6   4 -11    1.96    0.62
   7   4 -10    4.18    0.33
   9   4  -7    2.29    0.53
  10   4  -4    2.13    0.53
  10   5  -4   -1.52    1.29
  10   5  -3    2.73    0.48
   9   5  -6    2.95    0.46
   9   5  -7    5.84    0.28
   8   5  -8    4.82    0.31
   5   5 -11   -2.44    0.97
   4   5 -12    0.30    1.38
   1   5 -13    2.60    0.51
   0   5 -13    3.86    0.33
  -1   5 -13    1.26    1.46
  -3   5 -12   -2.20    0.97
  -4   5 -12    1.54    1.37
  -5   5 -11   -2.60    0.94
  -8   5  -8   -1.74    1.20
  -9   5  -6    3.82    0.37
 -10   5  -4    4.30    0.31
 -10   5  -3    1.24    1.47
 -10   6  -1   -1.72    1.23
 -10   6  -2    1.48    0.75
 -10   6  -3    5.07    0.29
  -9   6  -6    3.10    0.43
  -8   6  -8    2.58    0.54
  -7   6  -9    1.78    0.63
  -6   6 -10   -2.37    0.96
  -5   6 -11    1.24    1.50
  -3   6 -12    3.23    0.39
   3   6 -12    2.46    0.52
   5   6 -11    1.52    1.29
   6   6 -10    5.00    0.29
   7   6  -9    4.89    0.32
   8   6  -8    6.49    0.26
   9   6  -6    3.98    0.36
  10   6  -1   -2.36    1.01
  10   6  -2    3.76    0.38
  10   6  -3    6.60    0.25
  10   7  -3    3.07    0.44
  10   7  -2   -1.58    0.69
  10   7  -1    5.56    0.29
  10   7   0   -2.04    1.08
   9   7  -6   -2.99    0.88
   8   7  -8   -2.58    1.05
   7   7  -9    4.00    0.36
   6   7 -10    2.98    0.42
   5   7 -11    4.61    0.34
   3   7 -12   -2.06    1.03
   2   7 -12   -1.06    1.39
  -2   7 -12    2.23    0.49
  -3   7 -12   -2.33    1.12
  -5   7 -11    1.91    0.61
  -6   7 -10    1.47    0.75
  -7   7  -9    1.67    0.69
  -9   7  -5    2.41    0.52
  -9   7  -6    2.56    0.52
 -10   7  -2    1.04    0.92
 -10   7  -1   -2.47    0.93
 -10   7   0   -0.30    1.36
 -10   8   0    3.32    0.40
 -10   8  -1    3.53    0.40
  -9   8  -5    6.41    0.26
  -8   8  -7   -1.07    1.56
  -4   8 -11    3.06    0.41
  -2   8 -12    2.44    0.51
  -1   8 -12    2.26    0.54
   0   8 -12   -0.66    1.09
   1   8 -12    2.43    0.53
   2   8 -12    1.82    0.64
   4   8 -11    2.42    0.49
   6   8 -10    5.17    0.30
   7   8  -9    0.89    1.73
   8   8  -7    1.63    1.33
   9   8  -5    5.35    0.28
  10   8   0    3.29    0.41
  10   8  -1    3.56    0.39
   9   9  -4    2.43    0.52
   9   9  -5    3.46    0.41
   8   9  -7    5.39    0.29
   7   9  -8   -0.61    1.78
   6   9  -9    2.96    0.43
   5   9 -10    0.87    1.67
   4   9 -11   10.31    0.21
   1   9 -12   -2.79    0.87
   0   9 -12    3.27    0.44
  -1   9 -12   -2.16    1.10
  -3   9 -11    1.91    0.57
  -4   9 -11    6.32    0.27
  -5   9 -10    3.99    0.33
  -6   9  -9    4.25    0.32
  -7   9  -8    6.74    0.24
  -8   9  -7    3.95    0.39
  -9   9  -4    1.07    1.58
  -9  10  -4    0.30    1.43
  -9  10  -3    3.36    0.41
  -9  10  -2   -2.02    1.11
  -8  10  -6   -3.03    0.86
  -7  10  -8    0.00    2.35
  -6  10  -9    1.53    1.25
  -5  10 -10    2.58    0.53
  -3  10 -11    3.41    0.41
  -2  10 -11    3.97    0.35
   2  10 -11   -0.77    1.02
   3  10 -11   -0.62    1.80
   5  10 -10    3.48    0.42
   6  10  -9    5.61    0.28
   7  10  -8    5.07    0.29
   8  10  -6    2.61    0.49
   9  10  -4    6.24    0.27
   9  10  -3   -1.51    1.36
   9  10  -2    1.81    0.62
   9  11   0    4.24    0.34
   9  11  -1    7.44    0.24
   9  11  -2    5.50    0.30
   9  11  -3    6.18    0.26
   8  11  -5    5.78    0.27
   7  11  -7    4.96    0.31
   5  11  -9   -2.20    1.05
   4  11 -10   -1.95    1.17
   2  11 -11   -1.75    1.18
   1  11 -11   -2.88    0.90
   0  11 -11   -2.60    0.93
  -1  11 -11    0.00    2.29
  -2  11 -11    1.65    1.26
  -4  11 -10    0.88    1.68
  -5  11  -9    3.68    0.38
  -6  11  -8    4.35    0.32
  -7  11  -7    8.35    0.23
  -8  11  -5    2.76    0.48
  -9  11   0   -0.87    1.82
  -9  11  -1   -2.23    1.10
  -9  11  -2    4.89    0.30
  -8  12  -4   -1.95    1.20
  -7  12  -6    4.27    0.35
  -6  12  -8   -1.87    1.17
  -5  12  -9    3.82    0.36
  -3  12 -10    3.04    0.44
   0  12 -11   -1.98    1.09
   3  12 -10    3.13    0.42
   5  12  -9    4.39    0.35
   6  12  -8    1.53    1.24
   7  12  -6    4.53    0.32
   8  12  -4    3.58    0.39
   8  12  -5   -0.63    1.80
   8  13  -3   -1.86    1.15
   8  13  -2    2.90    0.46
   7  13  -5    3.12    0.40
   7  13  -6    5.99    0.27
   6  13  -7    7.54    0.22
   5  13  -8    3.32    0.38
   4  13  -9    8.37    0.23
   2  13 -10    4.59    0.34
   1  13 -10    4.41    0.33
   0  13 -10   -1.06    1.58
  -1  13 -10   -1.28    0.79
  -2  13 -10    4.86    0.31
  -4  13  -9    8.09    0.22
  -5  13  -8    2.36    0.53
  -6  13  -7    4.49    0.33
  -7  13  -5    0.87    1.60
  -7  13  -6    3.36    0.41
  -8  13  -3    8.64    0.22
  -8  13  -2    4.05    0.37
  -8  13  -1    1.37    1.43
  -8  14   0    2.58    0.53
  -8  14  -1    2.64    0.47
  -7  14  -5    0.63    1.88
  -7  14  -4   -0.29    1.33
  -6  14  -6    2.55    0.48
  -5  14  -7    2.06    0.55
  -4  14  -8    3.66    0.39
  -3  14  -9    6.50    0.26
  -2  14  -9    1.22    1.42
   0  14 -10    3.46    0.39
   3  14  -9    3.23    0.40
   4  14  -8    2.52    0.51
   6  14  -6    3.83    0.35
   7  14  -5   -0.30    1.37
   7  14  -4    1.63    1.28
   8  14   0    2.87    0.47
   8  14  -1    6.34    0.26
   7  15  -1    0.87    1.73
   7  15  -2   -2.81    0.92
   7  15  -3    1.39    1.45
   6  15  -5   -0.87    1.71
   5  15  -7    4.74    0.33
   4  15  -8    3.99    0.37
   3  15  -8    2.29    0.51
   2  15  -9    3.09    0.44
   1  15  -9    3.70    0.38
   0  15  -9    1.52    1.35
  -1  15  -9    3.57    0.35
  -2  15  -9   -2.50    1.00
  -3  15  -8    3.69    0.41
  -4  15  -8   -1.83    0.62
  -5  15  -7    3.78    0.38
  -6  15  -5    4.36    0.32
  -7  15  -1    2.20    0.52
  -7  15  -2    4.80    0.31
  -7  15  -3   -2.15    1.08
  -7  16  -1    0.74    1.09
  -7  16   0   -1.77    1.30
  -6  16  -3    2.92    0.43
  -6  16  -4    0.62    1.97
  -5  16  -6    4.79    0.31
  -5  16  -5   -1.02    0.88
  -4  16  -7    6.39    0.26
  -3  16  -7    3.14    0.37
  -2  16  -8    7.90    0.23
  -1  16  -8   -1.62    1.15
   0  16  -8   -1.06    1.46
   1  16  -8    0.87    1.67
   2  16  -8   -1.26    0.81
   4  16  -7   -1.39    1.40
   5  16  -6    1.53    1.37
   6  16  -3    1.98    0.62
   6  16  -4   -0.62    1.88
   7  16  -1    4.39    0.35
   7  16   0   -1.65    1.24
   6  17  -2   -1.66    0.70
   6  17  -1   -1.51    1.41
   6  17   0    2.69    0.46
   5  17  -4   -1.23    1.46
   5  17  -5   -0.89    1.70
   4  17  -6    1.85    0.61
   3  17  -6    4.91    0.29
   3  17  -7    0.89    1.60
   2  17  -7   -1.23    1.47
   1  17  -7    2.77    0.46
  -1  17  -7    1.37    1.39
  -2  17  -7   -1.26    0.81
  -3  17  -6    3.49    0.37
  -4  17  -6    1.25    1.48
  -4  17  -5    4.41    0.32
  -5  17  -4    3.73    0.37
  -6  17  -2    5.41    0.29
  -6  17  -1    3.09    0.43
  -6  17   0    1.49    0.75
  -5  18  -3    2.28    0.55
  -5  18  -2    5.70    0.27
  -5  18  -1   -1.63    1.29
  -5  18   0    1.07    1.55
  -4  18  -4    1.19    0.83
  -3  18  -5    1.51    0.70
  -2  18  -6   -0.88    1.69
  -1  18  -6    3.25    0.40
   0  18  -6    0.87    1.55
   1  18  -6   -2.03    1.06
   2  18  -6   -1.38    1.34
   3  18  -5    5.38    0.29
   4  18  -4    0.88    1.67
   5  18  -3   -2.42    1.05
   5  18  -2   -1.75    1.18
   5  18  -1   -2.13    1.05
   5  18   0    2.37    0.52
   4  19  -3    1.66    0.66
   4  19  -2    7.41    0.24
   4  19  -1    3.30    0.40
   4  19   0    2.50    0.51
   3  19  -3    0.87    1.54
   3  19  -4    4.95    0.30
   2  19  -5    1.65    0.70
   2  19  -4    3.03    0.44
   1  19  -5    4.23    0.33
   0  19  -5    3.42    0.38
  -1  19  -5   -1.07    0.89
  -2  19  -5   -0.30    1.39
  -2  19  -4    0.42    1.26
  -3  19  -3    1.78    0.63
  -3  19  -4    1.40    1.36
  -4  19  -2   -1.64    1.23
  -4  19  -1    3.75    0.39
  -4  19   0    2.49    0.51
  -3  20  -1    1.40    1.35
  -3  20   0    0.63    1.93
  -2  20   0    3.36    0.39
  -2  20  -1   -2.13    1.03
  -2  20  -2    4.70    0.34
  -2  20  -3   -1.08    1.62
  -1  20  -3    3.10    0.44
  -1  20  -2    2.27    0.52
   0  20  -2    5.26    0.28
   0  20  -3    6.85    0.25
   0  20  -4   -2.17    1.09
   1  20  -3   -2.05    1.10
   1  20  -2    7.32    0.23
   2  20   0    2.17    0.58
   2  20  -1    1.29    0.81
   2  20  -2    1.89    0.60
   2  20  -3    2.64    0.48
   3  20  -1   -3.53    0.78
   3  20   0   -3.46    0.81
   0  21   0   -2.50    0.99
 -10   0  -2   -2.30    0.99
 -10   0  -3    2.45    0.46
  -9   0  -6    4.77    0.30
  -8   0  -8    2.73    0.45
  -7   0  -9    0.76    0.97
  -6   0 -10    3.30    0.39
  -5   0 -11    2.07    0.55
  -3   0 -12    7.74    0.22
   3   0 -12    3.05    0.40
   4   0 -12   -1.93    1.12
   5   0 -11    0.00    1.51
   6   0 -10    1.83    0.55
   7   0  -9   -1.75    0.60
   8   0  -8    1.48    1.24
   9   0  -6    4.34    0.30
  10   0  -2    5.68    0.27
  10   0  -3    1.59    1.20
  10   0  -4   -1.72    1.28
  10   1  -3    6.85    0.24
  10   1  -2   -0.59    1.83
   9   1  -6    2.06    0.53
   8   1  -8   -1.59    1.18
   7   1  -9    4.96    0.27
   6   1 -10    1.71    0.61
   5   1 -11    3.08    0.36
   3   1 -12   -0.84    1.71
  -3   1 -12   -1.89    1.08
  -5   1 -11    7.81    0.23
  -6   1 -10   -1.78    1.15
  -7   1  -9    5.80    0.25
  -8   1  -8    1.79    0.65
  -9   1  -6    5.02    0.29
 -10   1  -3    0.92    0.97
 -10   1  -2    4.57    0.29
 -10   1  -1    3.00    0.43
 -10   2   0   -0.40    1.21
 -10   2  -1   -0.80    0.98
 -10   2  -2    1.47    1.28
 -10   2  -3   -1.60    1.18
  -9   2  -6   -0.82    0.97
  -8   2  -8    6.86    0.24
  -7   2  -9   -0.29    1.33
  -6   2 -10    4.24    0.31
  -5   2 -11    6.21    0.25
  -3   2 -12    1.47    1.28
   3   2 -12    6.95    0.23
   5   2 -11   -2.32    0.95
   6   2 -10    1.03    0.85
   7   2  -9    3.65    0.34
   8   2  -8    2.41    0.49
   9   2  -6    1.35    1.34
  10   2   0    1.37    0.73
  10   2  -1    2.88    0.44
  10   2  -2   -3.67    0.73
  10   2  -3    6.23    0.25
  10   3  -3    2.99    0.43
  10   3  -2    1.08    0.87
  10   3  -1    2.97    0.40
  10   3   0    1.58    1.28
   9   3  -6   -2.25    0.98
   8   3  -8    1.36    1.31

#===END
